# Supplementary material for: Orbital-scale climate dynamics impacts on Gzhelian peatland wildfire activity in the Ordos Basin
Source: Copernicus journal article supplement (doi:10.5194/cp-2024-42), 2024-06-20
Supplement: Supplementary file 1 [file cp-2024-42-supplement.pdf]

**Supplement**

**Table S1**

A summary of 29 published occurrences in the Gzhelian wildfire record.

| Wildfire evidence type                                      | Paleogeography | Present location                           | Latitude (N°) | Longitude (E°) | Paleolatitude (N°) | Paleolongitude (E°) | Unit                          | Rock type    | References                                           |
|-------------------------------------------------------------|----------------|--------------------------------------------|---------------|----------------|--------------------|---------------------|-------------------------------|--------------|------------------------------------------------------|
| Charcoal type I/Charcoal type II                            | S Laurasia     | US(Carrizo Arroyo, New Mexico)             | 34.36         | -107           | -0.16              | -37.41              | Bursum Fm                     | LS&C         | Dimichele et al., 2016                               |
| Charcoal type I/Charcoal type II                            | S Laurasia     | Germany(Saar-Nahe Basin)                   | 49.53         | 7.31           | 2.01               | 17.78               | Heusweiler Fm & Meisenheim Fm | CL&C         | Uhl et al., 2004; Uhl and Jasper, 2021               |
| Charcoal type I/Pyrogenic PAHs                              | E Laurasia     | China(Yuzhou Coalfield, North China Basin) | 34.27         | 113.44         | 16.53              | 82.87               | Taiyuan Fm                    | C            | Shen et al., 2023                                    |
| Charcoal type I                                             | S Laurasia     | Germany(Zwickau Subbasin)                  | 50.71         | 12.46          | 4.1                | 20.6                | Zwickau Fm                    | C            | Schneider and Rößler, 2023                           |
| Charcoal type II                                            | S Laurasia     | US(Texas)                                  | 33.31         | -98.78         | -5.02              | -32.5               | Markley Fm                    | CL           | Looy and Hotton, 2014                                |
| Charcoal type I                                             | E Laurasia     | China(Ordos Basin)                         | 35.78         | 112.16         | 18.36              | 82.66               | Taiyuan Fm                    | C            | Dai et al., 2006; Dai et al., 2008; Driesel, 2010    |
| Charcoal type I                                             | E Laurasia     | China(Feicheng Coalfield)                  | 36.21         | 116.57         | 17.06              | 86.17               | Taiyuan Fm                    | C            | Querol et al., 1999; Driesel, 2010                   |
| Charcoal type I                                             | E Laurasia     | China(Shandong mining)                     | 35.35         | 116.42         | 16.35              | 85.65               | Taiyuan Fm                    | C            | Querol et al., 1999; Liu et al., 2004; Driesel, 2010 |
| Charcoal type I                                             | E Laurasia     | China(Pingsdingshan Coalfield)             | 33.8          | 113.25         | 16.19              | 82.49               | Taiyuan Fm                    | C            | Zhou et al., 1990 (In Chinese); Driesel, 2010        |
| Charcoal type I                                             | E Laurasia     | China(Xingtai Coalfield)                   | 37            | 114.48         | 18.54              | 85                  | Taiyuan Fm                    | C            | Sun et al., 2002; Driesel, 2010                      |
| Charcoal type I                                             | S Laurasia     | US(Appalachian Basin)                      | 40.74         | -79.86         | -5.36              | -15.65              | Monogahela Gp                 | C            | Ehle et al., 2003; Driesel, 2010                     |
| Charcoal type I                                             | S Laurasia     | Czech Republic(Kladno-Rakovnik Basin)      | 50.21         | 14.09          | 4.39               | 22.86               | Slaný Fm                      | C            | Lojka et al., 2009; Lojka et al., 2010               |
| Pyrogenic PAHs                                              | S Laurasia     | Ukraine(Donets Basin)                      | 48.69         | 39.45          | 10.6               | 36.96               | unknow                        | C            | Izart et al., 2006; Izart et al., 2012               |
| Charcoal type I                                             | S Laurasia     | Czech Republic(Intra-Sudetic Basin)        | 50.51         | 15.94          | 4.67               | 22.75               | Chvale'c Fm & Odolov Fm       | C            | Sýkorová et al., 2016; Kříbek et al., 2021           |
| Charcoal type II                                            | E Laurasia     | China(Yuzhou Coalfield, North China Basin) | 34.27         | 113.44         | 16.53              | 82.87               | Benxi Fm                      | MS           | Lu et al., 2021                                      |
| Charcoal type I                                             | S Laurasia     | US(Jefferson County, Ohio)                 | 40.08         | -104.93        | 3.35               | -32.6               | Conemaugh Gp                  | C            | Dimichele et al., 1996                               |
| Charcoal type I                                             | S Laurasia     | Poland(Lublin Coal Basin)                  | 51.3          | 23             | 7.2                | 26.52               | Lublin Fm                     | C            | Parzentny et al., 2018                               |
| Charcoal type I                                             | S Laurasia     | UK(Yorkshire)                              | 53.7          | -1.45          | 4.97               | 11.6                | Low Bamsley Seam              | C            | Scott, 2022                                          |
| Charcoal type I                                             | S Laurasia     | US(Appalachian Basin)                      | 37.65         | -80.6          | -8.04              | -17.3               | Conemaugh Fm                  | C            | Glasspool and Scott, 2010; Glasspool et al., 2015    |
| Charcoal type I                                             | S Laurasia     | US(Appalachian Coalfield, Ohio)            | 36.98         | -81.14         | -8.51              | -17.96              | Washington Fm & Dunkard Gp    | C            | Glasspool and Scott, 2010; Glasspool et al., 2015    |
| Charcoal type I                                             | S Laurasia     | US(Appalachian Coalfield, Ohio)            | 39.42         | -76.83         | -7.3               | -13.21              | Glenshaw Fm & Conemaugh Gp    | C            | Glasspool and Scott, 2010; Glasspool et al., 2015    |
| Charcoal type I                                             | S Laurasia     | US(Eastern Coalfield, Illinois Basin)      | 41.72         | -88.29         | -1.93              | -21.08              | Mattoon Fm                    | C            | Glasspool and Scott, 2010; Glasspool et al., 2015    |
| Charcoal type I                                             | S Laurasia     | Germany(Saar Coalfield)                    | 49.5          | 6.79           | 1.89               | 17.46               | Stephanian A Coals            | C            | Prange, 1989                                         |
| Charcoal type I                                             | S Laurasia     | France(Massif Central, Ales Basin)         | 48.49         | 2.67           | 0.3                | 15.06               | Samples A30-36 (one seam)     | C            | Copard et al., 2002                                  |
| Charcoal type I                                             | S Laurasia     | US(Somerset County, Pennsylvania)          | 40.04         | -79.05         | -6.23              | -15.32              | Monongahela Gp                | C            | Hower et al., 2022                                   |
| Charcoal type I                                             | S Laurasia     | US(West Virginia)                          | 39.51         | -80.16         | -6.43              | -16.31              | Monongahela Gp                | C            | Hower et al., 2022                                   |
| Charcoal type I                                             | S Laurasia     | US(Belmont County, Ohio)                   | 40.33         | -82.78         | -4.92              | -17.88              | Monongahela Gp                | C            | Hower et al., 2022                                   |
| Charcoal type I                                             | S Laurasia     | US(New Era Mine, Illinois Basin)           | 37.81         | -88.62         | -5.31              | -23.07              | unknow                        | C            | Presswood et al., 2016                               |
| Charcoal type I                                             | E Laurasia     | China(Yaogou mine)                         | 39.53         | 111.19         | 19.22              | 83.9                | Taiyuan Fm                    | C            | This study                                           |
| Charcoal type I - pyrogenic inertinite from coals           |                |                                            |               |                |                    |                     |                               | CL:clay      |                                                      |
| Charcoal type II - fossil charcoal from elastic sediments   |                |                                            |               |                |                    |                     |                               | LS:limestone |                                                      |
| Pyrogenic PAHs - Pyrogenic polycyclic aromatic hydrocarbons |                |                                            |               |                |                    |                     |                               | C:coal       |                                                      |
|                                                             |                |                                            |               |                |                    |                     |                               | MS:mudstone  |                                                      |
