# Supplementary material for: Orbital-scale climate dynamics impacts on Gzhelian peatland wildfire activity in the Ordos Basin
Source: Copernicus journal article supplement (doi:10.5194/cp-2024-42), 2024-06-20
Supplement: Supplementary file [file cp-2024-42-RC2-supplement.pdf]

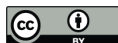

1 **Orbital-scale climate dynamics impacts on Gzhelian peatland wildfire activity in**  
2 **the Ordos Basin**

3 Wenxu Du<sup>1</sup>, Dawei Lv<sup>1\*</sup>, Zhihui Zhang<sup>1\*</sup>, Munira Raji<sup>2</sup>, Cuiyu Song<sup>1</sup>, Luoqing Wang<sup>1</sup>, Zekuan Li<sup>1</sup>,  
4 Kai Cao<sup>1</sup>, Ruoxiang Yuan<sup>1</sup>, Yuzhuang Sun<sup>3</sup>

5 <sup>1</sup> Shandong Provincial Key Laboratory of Depositional Mineralization and Sedimentary Minerals,  
6 College of Earth Sciences and Engineering, Shandong University of Science and Technology,  
7 Qingdao 266590, China

8 <sup>2</sup> Sustainable Earth Institute, University of Plymouth, Devon, United Kingdom

9 <sup>3</sup> College of Earth Science and Engineering, Hebei University of Engineering, Handan 056038,  
10 Hebei, China

11 \*Corresponding author: College of Earth Sciences and Engineering, Shandong University of  
12 Science and Technology, Qingdao 266590, China.

13 E-mail addresses: [lvdawei95@163.com](mailto:lvdawei95@163.com) (D. Lv), [zhzhihui@sdust.edu.cn](mailto:zhzhihui@sdust.edu.cn) (Z. Zhang).

14 **Abstract**

15 The Carboniferous, an important coal-forming period in geological history, was characterized  
16 by extensive vegetation and high oxygen levels. Numerous wildfire evidence suggests that high  
17 frequency of wildfire occurred at that time, specifically in peatlands. However, the control  
18 mechanisms for changes in wildfire activity in peatlands during this period are still not clearly  
19 understood. In this study, evidence from the Gzhelian in the Ordos Basin, such as the  
20 inertinite/vitrinite (I/V) ratio, indicated the existence of different frequencies of wildfire activity at  
21 that time. The CaO/MgO and CaO/MgO · Al<sub>2</sub>O<sub>3</sub> climate indicators revealed that high-frequency  
22 wildfires mainly occur in warm and humid climates. Based on former age constraints, we deduced  
23 that orbital cycles (long eccentricity) controlled the climate influence on peatland wildfires during



24 the Gzhelian. When eccentricity was high, abundant sunshine and frequent rainfall led to warmer  
25 and more humid peatlands. The latter environments were more favourable for vegetation  
26 development, leading to increased fuel loads, which in turn led to more frequent wildfires.  
27 Moreover, the Gzhelian global wildfire records, showed that evidence of wildfire during this period  
28 was mainly located in areas with abundant tropical vegetation, supporting the view that wildfire  
29 activity during this period was mainly controlled by the fuel loads. Although Hg could be produced  
30 by peatland wildfires, but our results show that Hg was mainly from frequent volcanic activity  
31 during this period.

32 **Keywords:** Wildfire; Inertinite; Gzhelian; Hg; Long eccentricity

### 33 **1. Introduction**

34 In recent years, information about wildfires preserved in coal seams has been ~~exposed~~ (Robson  
35 et al., 2015; Hou et al., 2022; Zhang et al., 2022). ~~The macerals in the~~ pyrogenic inertinite (fossil  
36 charcoal in coal), such as fusinite, semifusinite, and inertodetrinite, have been widely used as direct  
37 evidence to demonstrate the occurrence of paleo-wildfires (Scott, 2010, 2022; Jasper et al., 2013;  
38 Belcher and Hudspith, 2017; Uhl et al., 2022; Shen et al., 2023). The Carboniferous through  
39 Permian were important coal-forming periods in geologic history where large deposits of coal  
40 developed (Berner, 2003). Although wildfires of the period have been somewhat summarized by  
41 previous authors (e.g., Scott, 2000; Glasspool and Scott, 2010; Glasspool et al. 2015; Jasper et al.  
42 2021), there is a dearth of high-resolution wildfire records from the period. Glasspool et al. (2015)  
43 concluded from the analysis of the inertinite in coal that the frequency of wildfires during the Late  
44 Paleozoic was mainly due to the higher oxygen content in the atmosphere at that time. However,  
45 more detailed controlled factors for Carboniferous through Permian wildfires need to be improved.

46 Many researchers have found that changes in charcoal abundance in sediments indicate



47 changes in orbital cycle forcing climate change, which in turn influences wildfire activity (Verardo  
48 and Ruddiman, 1996; Thevenon et al., 2004; Hao et al., 2020; Shi et al., 2020; Cheng et al., 2022).  
49 Daniau et al. (2013) found that the past 170 kyr of grassland wildfire activity in southern Africa has  
50 been controlled by precession. Zhang et al. (2020a, 2023) found that wildfire activity during the  
51 Early to Middle Jurassic was influenced by changes in long eccentricity (405 kyr) and the  
52 precession cycle. ~~The orbital period~~ (eccentricity, obliquity, and precession) forces climate change,  
53 thus affecting the amount and flammability of vegetation fuels to control wildfire activity (Zhou et  
54 al., 2023). ~~The study of whether~~ wildfire activity in Carboniferous to Permian peatlands was  
55 controlled by changes in orbital cycles is unclear. Late Carboniferous Gzhelian global wildfire  
56 records indicate that ~~the wildfire records~~ were all distributed in tropical climate zones. Tropical  
57 climate zones ~~have~~ abundant fuel accumulation and orbital cycle forcing ~~wildfire activity may be~~  
58 ~~more pronounced~~ (DiMichele, 2014).

59 As the largest Late Carboniferous to Early Permian peat basin in China, the Ordos Basin  
60 contained ~~a large amount of coal seams, which were~~ preserved with numerous volcanic ~~ashes~~ and  
61 wildfire products in the coal seams (Wang, 2017; Xu et al., 2020; Zhao et al., 2023; Zhang et al.,  
62 2023a, 2023b). In this paper, the focus is on the No. 9 coal of the Yaogou Coal Mine in the Jungar  
63 Coalfield of the Ordos ~~order~~ to understand the occurrence of the Late Carboniferous wildfires and  
64 the variation of burning temperatures. Employing the clear age constraints of the No.9 coal seam,  
65 the possible role of long eccentricity orbital cycle changes in driving wildfires by means of wildfire  
66 frequency and climate indicators at that time can be explored (Zhang et al., 2023a). Volcanic  
67 activity, frequent wildfires, and other causes can lead to Hg enrichment, and this study also explores  
68 the relationship between wildfire activity, volcanic activity, and Hg at that time, using changes in  
69 Hg content in No. 9 coal.



## 70 2. Geological setting

71 The Ordos Basin, located at the western margin of the North China Craton, is the second  
72 largest terrestrial sedimentary basin in China (Ao et al., 2012; Zhang et al., 2023a). The Jungar  
73 Coalfield is in the southwestern part of the Inner Mongolia Autonomous Region of China and in the  
74 northeastern part of the Ordos Basin, which contains about 26.8 Gt of coal reserves, which is one of  
75 the richest coal reserves in northern China (Dai et al., 2006,2008,2012; Li et al., 2016). The  
76 coalfield contains coal-bearing sequences of the Carboniferous and Permian systems (Wang et al.,  
77 2011).

78 This study was conducted in the Yaogou Mine, in the northeastern part of the Jungar Coal  
79 Field (Fig. 1b). The coal-bearing sequences in the Yaogou Mine include the Benxi Formation,  
80 Taiyuan Formation, and Shanxi Formation, with a total thickness of 84~200 m (Zhang et al., 2023a).  
81 The Benxi Formation, with a total thickness of 84~200 m (Zhang et al., 2023a), lies unconformably  
82 on the Middle Ordovician Majiagou Formation, with a thickness of about 17~28 m. The Taiyuan  
83 Formation is underlying by the Benxi Formation. The Taiyuan Formation, with a thickness of about  
84 31-75 m (average 58 m), conformably overlies the Benxi Formation. The Taiyuan Formation  
85 consists mainly of grey and gray-white quartz sandstone, siltstone, mudstone, and five coal beds  
86 marked from top to base as No. 6 to No. 10 (Fig. 1c) (Zhang et al., 2023a). Zhang et al. (2023a)  
87 determined by U-Pb zircon from altered volcanic ashes at the top and bottom of No. 9 coal that the  
88 Taiyuan Formation in this study area belongs to the Gzhelian stage of the Late Pennsylvanian. The  
89 Shanxi Formation with a thickness of about 35-97 m is mainly terrigenous coal-bearing clastic  
90 rocks, dominated by sandstones and coal seams (Zhang et al., 2023a).

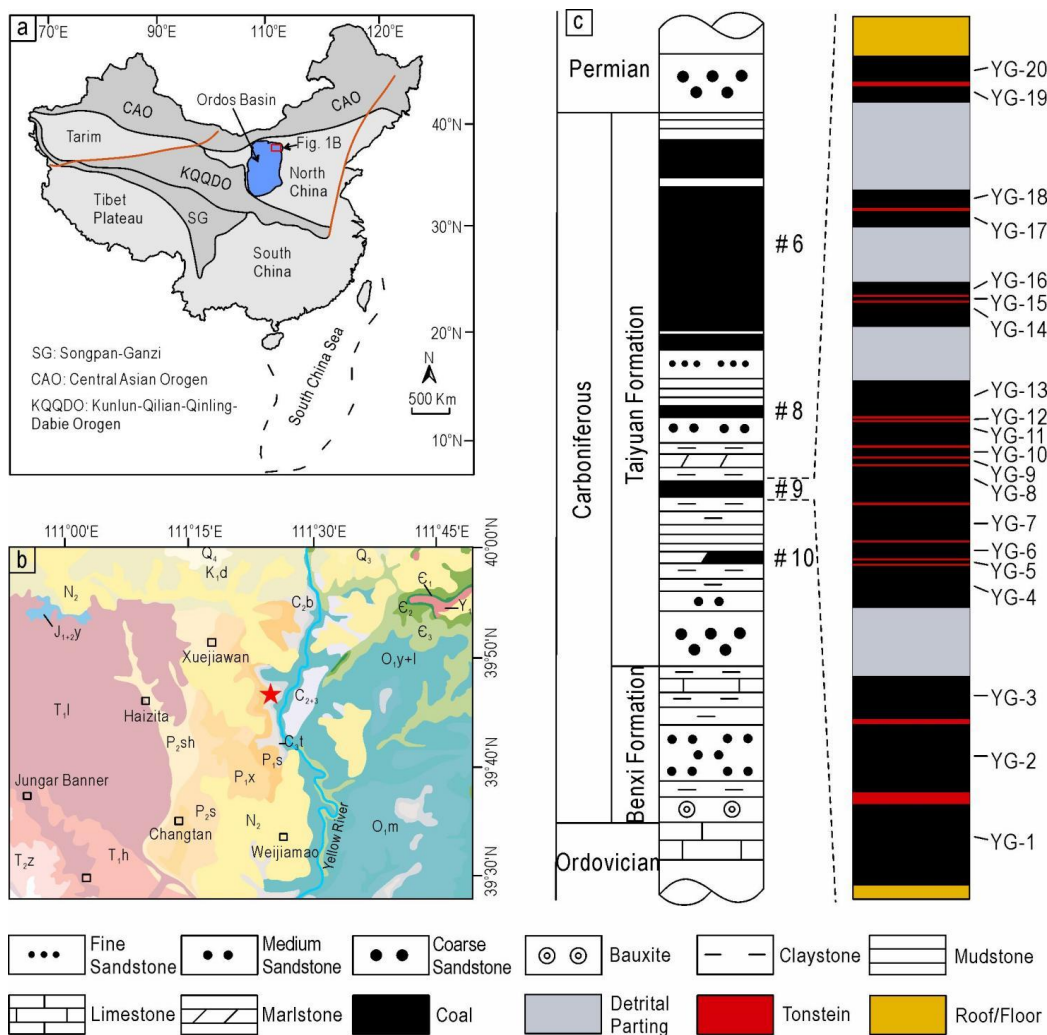

91  
 92 **Fig. 1** Comprehensive geologic map of the Yaogou coal mine in the Ordos Basin, northern China. (a) Map  
 93 showing the location of the Ordos Basin and the study area. (b) Geologic map of the study area showing the  
 94 location of the study area (red stars). (c) Sedimentary sequence of the Jungar Coal Field and columnar map of the  
 95 No. 9 coal seam. The No. 9 coal occurs in the Taiyuan Formation. Q<sub>4</sub>-Holocene, Q<sub>3</sub>-Pleistocene, N<sub>2</sub>-Pliocene,  
 96 K<sub>1d</sub>-Dongsheng Formation (Fm.), J<sub>1+2y</sub>-Yan'an Fm., T<sub>2z</sub>-Zhifang Fm., T<sub>1h</sub>-Heshanggou Fm., T<sub>1l</sub>-Liujiagou Fm.,  
 97 P<sub>2sh</sub>-Shiqianfeng Fm., P<sub>2s</sub>-upper Shihezi Fm., P<sub>1x</sub>-lower Shihezi Fm., P<sub>1s</sub>-Shanxi Fm., C<sub>3t</sub>-Taiyuan Fm.,  
 98 C<sub>2b</sub>-Benxi Fm., O<sub>1m</sub>-Majiagou Fm., O<sub>1y+I</sub>-Yeli and Liangjiashan Formations. Figure modified from Zhang et al.  
 99 (2023a).



### 100 **3. Material and methods**

#### 101 **3.1 Sampling**

102 In this study, a total of 20 coal samples were collected from the exposed face of the No. 9 coal  
103 at the Yaogou Mine, with a cumulative thickness of the profile of about 6.1 m. To minimize  
104 contamination and oxidation, the samples were all immediately stored in plastic bags. From bottom  
105 to top, all coal samples were marked YG-1 to YG-20 (Fig. 1c).

#### 106 **3.2 Analytical method**

107 The analytical methods used in this study to demonstrate wildfire characteristics included  
108 petrographic analysis, coal rock micro component identification, fusinite reflectance measurements,  
109 and scanning electron microscopy (SEM).

110 The collected fossil charcoal fragments were crushed to a < 20 top size and the crushed  
111 samples were embedded in epoxy resins. The reflectance of the fusinite was measured by the oil  
112 immersion at room temperature and determined using an MSP UV-VIS2000 spectrophotometer  
113 (Petersen and Lindström, 2012; Xu et al., 2020). To estimate the wildfire burning temperatures  
114 represented by the experimental samples, calculations were based on the correlation proposed by  
115 previous works:

$$116 T=184.1+117.76\times\%R_o, \quad (1)$$

117 with  $R_o$  represents the reflectance of the inertinite (Jones, 1997; Petersen and Lindström, 2012).

118 Based on the model of oxygen content proposed by Glasspool (2010, 2015), the oxygen content in  
119 the atmosphere was predicted for the period of this study:

$$120 I=(0.5-0.5\cos[\pi(O-O_{\min})/(O_{\max}-O_{\min})])^n, \quad (2)$$

121 with  $I$  as the average inertinite content,  $O$  as the oxygen content,  $O_{\max}$  as the oxygen content when  
122 the inertinite content reached 100%, and  $O_{\min}$  as the oxygen content when was no inertinite.



123 The microstructure of fossilized charcoal samples was observed by SEM to ~~make a clearer~~  
124 ~~observation~~ of fossilized charcoal samples. The samples were observed under vacuum conditions  
125 using a 10 kV accelerating voltage, standard beam light, and a secondary electron probe. All the  
126 above experiments were completed at the Shandong Provincial Key Laboratory of Depositional  
127 Mineralisation and Sedimentary Minerals, Shandong University of Science and Technology.

128 To determine ~~the coal rock components~~, the coal samples taken were measured according to  
129 the National Standard GB/T8899-2013. ~~The reflectivity of the vitrinite group of the coal samples~~  
130 was measured according to the National Standard GB/T 6948-2008. To improve the quantification  
131 of charcoal abundance in each single sample, the ratio between inertinite maceral and vitrinite  
132 macerals (I/V), was calculated to determine the frequency of wildfires (Zhang et al., 2022). All of  
133 the latter experiments were completed ~~in~~ Xi'an Coal Science and Technology Ltd. All samples were  
134 analyzed for Total Organic Carbon (TOC) according to the National Standard GB/T19145-2003. ~~All~~  
135 ~~samples were analyzed for~~ Hg concentration according to the National Standard GB/T  
136 22105.1-2008. All above experiments were completed at the Beijing Qingchen Huanyu Petroleum  
137 Geological Technology Co. Ltd.

### 138 **3.3 Data Synthesis**

139 To build a reliable database of the Gzhelian wildfire evidence, data was compiled from  
140 peer-reviewed journal publications following the program of Lu (2021) and Lv (2024). Personal  
141 data and unpublished materials were not included in our study. ~~We used the keywords ‘Gzhelian~~  
142 ~~wildfire’, ‘charcoal’, ‘inertinite’, ‘fusain’, ‘fusinite’, and/or ‘PAHs’ to search papers in Google~~  
143 ~~Scholar, Web of Science, ScienceDirect, and JSTOR. Literature searches were conducted by the end~~  
144 ~~of April 2024.~~

145 To minimize the possibility of ~~low credible/reliable~~ wildfire data, the data published in the



146 original article was double-checked and evaluated before inclusion in our database. The evidence  
147 for fossil charcoal in the database is based on the standardized guidelines in Scott (2000,2010,2020).  
148 The distinction between sources of PAHs (pyrogenic and petrogenic) was made according to Yunker  
149 et al. (2002), and only records of pyrogenic PAHs were included. For example, Hower et al. (2022)  
150 had ~~two~~ inertinite data that did not have details of where samples were taken, so they were  
151 discarded. The inertinite in Presswood et al. (2016) was due to magmatic intrusion, so it was  
152 discarded.

153 Three types of Gzhelian wildfire evidence were included in the database: charcoal type I  
154 (pyrogenic inertinite macerals from coals), charcoal type II (fossil charcoal from clastic sediments),  
155 and pyrogenic PAHs. The location (e.g., country, state/province, city, latitude, longitude, etc.),  
156 palaeogeographical localities (e.g., palaeocontinents, palaeolatitude, and palaeolongitude),  
157 stratigraphic unit (e.g., formation, group), and rock type (e.g., coal, sandstone, mudstone) were  
158 integrated for each wildfire record. When multiple studies reported wildfire data from the same  
159 geologic unit in the same location (e.g., section, region, or basin), they were considered as one  
160 record (Lu et al., 2021). Depending on the type of evidence, wildfire occurrences in the same study  
161 site can be identified in different studies and recorded as one occurrence.

162 The GPlates 2.2.0 model constructed by Scotese (2008) was used to estimate paleolatitudes  
163 and paleolongitudes data for wildfire occurrence. To provide a visual representation of the spatial  
164 distribution, the occurrence of wildfires was projected on a paleogeographic map of Gzhelian by  
165 Scotese (2021) (Fig. 9).

## 166 **4. Results**

### 167 ***4.1 Coal rock micro component and geochemical characterization***

168 ~~The microscopic component contents of the coal samples collected in the mineral-free state~~





169 from No.9 coal of Yaogou Mine are shown in Table 1. ~~Of all the samples, the vitrinite~~ was dominant,  
170 with contents ranging from 64.5% to 84.7% (average = 73.5%). The inertinite content of the coal  
171 samples ranged from 14.1% to 30.8%, with an average content of 22.3%. ~~The liptinite had the~~  
172 ~~lowest content,~~ ranging from 1.3% to 8.7%, with an average content of 4.2%. Nearly all inertinite  
173 preserved in coal was defined as an incomplete combustion product, comparable to fossil charcoal  
174 (Scott 2000, 2010; Scott and Glasspool 2006, 2007; Diessel, 2010). Because of this, subcomponent  
175 analyses were analyzed ~~for the inertinite in the coal samples Table 1. In the 20 coal samples, the~~  
176 main component of the inertinite was semifusinite, with contents ranging from 7.4% to 17.2% ~~with~~  
177 an average content of 11.5%. The content of inertodedetrinite was rather low, ranging from 1.8% to  
178 13.4%, with an average content of 6.6%. The contents of fusinite, macrinite, and micrinite were low,  
179 with average contents of 1.2%, 2.3% and 0.7%. Among the 20 samples, the variation of  
180 inertinite/vitrinite ranged from 0.17 to 0.47, with a mean value of 0.31. The reflectance ( $R_{\text{v0}}$ ) of the  
181 vitrinite of the 20 coal samples ranged from 0.37% to 0.66.

182 The TOC content of the 20 coal samples from the Taiyuan Formation ranged from 27.82% to  
183 48.07%, with an average content of 39.49% (Table 2). The Hg content of the 20 samples varied  
184 greatly, ranging from 29.5 ppb to 393 ppb, with an average of 134.96 ppb (Table 2). Zhang et al.  
185 (2023a) analyzed the sulfur content,  $\text{Al}_2\text{O}_3$  content, and ash yield of 20 coal seams in the Taiyuan  
186 Formation in this study area (Table 2). The Spearman correlation ~~analysis showed that the~~  
187 ~~correlation~~ between Hg and  $\text{Al}_2\text{O}_3$  in the 20 coal samples from Taiyuan Formation is highly  
188 significant, with positive correlation, the correlation coefficient is +0.529, and ~~the~~ significance is   
189 0.016 (Fig. 6a). The correlation between Hg and sulfur is not significant with ~~the~~ correlation  
190 coefficient of -0.175 and significance of 0.46 (Fig. 6b). The correlation between Hg and TOC is  
191 significant, with a correlation coefficient of -0.659, and ~~the~~ significance is 0.002 (Fig. 6c). Since the



192 source of elemental aluminum in coal is mainly clay minerals, the correlation between elemental Al  
193 and ash yield was analyzed. The correlation between elemental Al and ash yield in the coal samples  
194 of this study was highly significant with a correlation coefficient of +0.776 and significance of 0.  
195 The correlation between elemental Hg and ash yield was significant and positive with the  
196 correlation coefficient of +0.481 and significance of 0.032 (Fig. 6d).

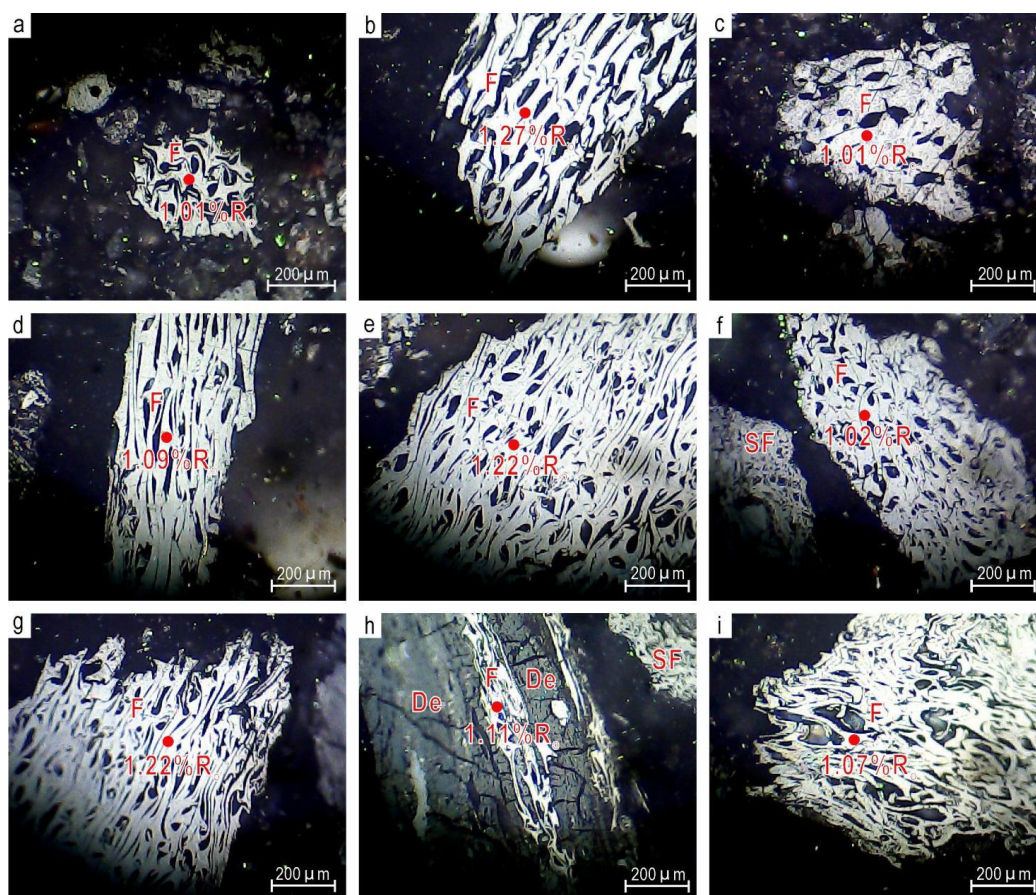

197  
198 **Fig. 2** Features of fossil charcoal in the Ordos Basin Taiyuan Formation observed under the oil immersion optical  
199 microscopy. F-fusinite; SF-semifusinite; Red circles show the test points, and numbers show the reflectance  
200 values of the points.



201 **Table 1**

202 The coal micro component contents of 20 seams of No. 9 coal from Yaogou Mine in Ordos Basin

| Sample No. | Percentage of the total organic macerals (vol.%) |            |           |          | Percentage of the total inertinite macerals (vol.%) |           |           |                  | TOM (vol.%) | Total minerals (vol.%) |
|------------|--------------------------------------------------|------------|-----------|----------|-----------------------------------------------------|-----------|-----------|------------------|-------------|------------------------|
|            | Vitrinite                                        | Inertinite | Liptinite | Fusinite | Semifusinite                                        | Macrinite | Micrinite | Inertode trinite |             |                        |
| YG-1       | 79.6                                             | 14.6       | 5.8       | 1.1      | 9.3                                                 | 0         | 0.2       | 4                | 53.9        | 46.1                   |
| YG-2       | 80.5                                             | 16         | 3.5       | 2.4      | 10.6                                                | 0.6       | 0.6       | 1.8              | 60.4        | 39.6                   |
| YG-3       | 68.3                                             | 27.4       | 4.3       | 0.9      | 14.1                                                | 1.5       | 2.6       | 8.3              | 81.2        | 18.8                   |
| YG-4       | 64.5                                             | 26.8       | 8.7       | 0.4      | 13.3                                                | 2.4       | 0.4       | 10.3             | 84.8        | 15.2                   |
| YG-5       | 84.7                                             | 11.9       | 3.4       | 0.4      | 7.4                                                 | 1.5       | 0.2       | 2.4              | 84.9        | 15.1                   |
| YG-6       | 65.2                                             | 30.8       | 4         | 0        | 14.6                                                | 2.4       | 0.4       | 13.4             | 86.2        | 13.8                   |
| YG-7       | 72.2                                             | 23         | 4.8       | 3        | 10.7                                                | 3         | 0.8       | 5.5              | 87.1        | 12.9                   |
| YG-8       | 70.8                                             | 21.5       | 7.7       | 2.5      | 12.2                                                | 1.5       | 0.2       | 5.1              | 81.8        | 18.2                   |
| YG-9       | 78.4                                             | 19.1       | 2.5       | 0        | 9.8                                                 | 2.5       | 0.4       | 6.4              | 80.1        | 19.9                   |
| YG-10      | 66.1                                             | 27.4       | 6.5       | 3.8      | 13.1                                                | 3.2       | 0.6       | 6.7              | 83.9        | 16.1                   |
| YG-11      | 75.2                                             | 23.5       | 1.3       | 0.6      | 12                                                  | 3.4       | 0.2       | 7.3              | 79.6        | 20.4                   |
| YG-12      | 72.1                                             | 25.1       | 2.8       | 0.9      | 15.4                                                | 2.2       | 0.4       | 6.2              | 73.9        | 26.1                   |
| YG-13      | 65.8                                             | 30.2       | 4         | 0.8      | 17.2                                                | 4.1       | 1.8       | 6.3              | 86.2        | 13.8                   |
| YG-14      | 82                                               | 14.1       | 3.9       | 0        | 8.3                                                 | 2.1       | 0         | 3.7              | 81.3        | 18.7                   |
| YG-15      | 80.2                                             | 18.4       | 1.4       | 0        | 11.2                                                | 0.8       | 0.6       | 5.8              | 77          | 23                     |
| YG-16      | 81.8                                             | 16.5       | 1.7       | 0        | 10.4                                                | 1.2       | 1.2       | 3.7              | 85.2        | 14.8                   |
| YG-17      | 78.1                                             | 18.4       | 3.5       | 2.7      | 9                                                   | 1.7       | 0.5       | 4.5              | 59.5        | 40.5                   |
| YG-18      | 66.8                                             | 28.9       | 4.3       | 0.8      | 11.3                                                | 4.7       | 0         | 12.1             | 59.9        | 40.1                   |
| YG-19      | 73                                               | 24.9       | 2.1       | 1.1      | 8.9                                                 | 2.9       | 0.4       | 11.6             | 71.5        | 28.5                   |
| YG-20      | 65                                               | 27.2       | 7.8       | 3.2      | 11                                                  | 4.1       | 2         | 6.9              | 81.8        | 18.2                   |

203



204 **Table 2**

205 The chemical element data of 20 coal seams from the No. 9 coal of the Yaogou coal mine in the Ordos Basin. The  
206 Al<sub>2</sub>O<sub>3</sub>, TS, and TOC were from Zhang et al. (2023a).

| Sample | Hg (ppb) | Al <sub>2</sub> O <sub>3</sub> (%) | TS (%) | TOC (%) |
|--------|----------|------------------------------------|--------|---------|
| YG-1   | 255      | 16.33                              | 0.23   | 27.82   |
| YG-2   | 145      | 11.94                              | 0.39   | 29.92   |
| YG-3   | 63.2     | 7.67                               | 0.44   | 47.30   |
| YG-4   | 118      | 9.46                               | 0.77   | 44.14   |
| YG-5   | 58.6     | 8.96                               | 0.32   | 48.07   |
| YG-6   | 70.4     | 12.75                              | 0.41   | 42.04   |
| YG-7   | 85.1     | 7.44                               | 0.57   | 44.72   |
| YG-8   | 35.4     | 7.42                               | 0.52   | 48.04   |
| YG-9   | 43.5     | 11.87                              | 0.45   | 41.17   |
| YG-10  | 269      | 10.5                               | 0.59   | 41.51   |
| YG-11  | 88.5     | 10.53                              | 0.48   | 38.10   |
| YG-12  | 83.9     | 10.74                              | 0.5    | 35.33   |
| YG-13  | 34.5     | 9.57                               | 0.48   | 46.26   |
| YG-14  | 156      | 12.77                              | 0.35   | 40.37   |
| YG-15  | 352      | 16.48                              | 0.42   | 32.35   |
| YG-16  | 237      | 14.23                              | 0.32   | 36.72   |
| YG-17  | 393      | 12.42                              | 0.36   | 29.26   |
| YG-18  | 152      | 17.88                              | 0.29   | 32.05   |
| YG-19  | 29.5     | 13.53                              | 0.3    | 37.95   |
| YG-20  | 29.6     | 7.57                               | 0.44   | 46.68   |

207 **4.2 Microscopic observations of fossil charcoal**

208 Under the oil-immersion reflected-light microscope, a large amount of semifusinite was  
209 observed in the coal samples of the Taiyuan Formation. Some representative micrographs are  
210 provided in Fig. 2. The pore sizes of the semifusinite ranged from 40 - 120 μm, with a small  
211 variation in pore size. The measured reflectance of the inertinite of 20 coal samples from the  
212 Taiyuan Formation ranged from 1.01% to 2.07%, with the average value of 1.66%.

213 The structural features of the fibre structure and the cell wall in the fossil charcoal fragments  
214 can be observed by SEM. The majority of the cellular structures were crushed or broken (Fig. 3a,c).  
215 As shown by the radial structure, the tubular cells were straight and 10-20 μm wide (Fig. 3a). There  
216 was one single row of circular or elliptical pitting with 0.5-2 μm width (Fig. 3b). And the cell walls



217 of the samples showed homogenization (Fig. 3d).

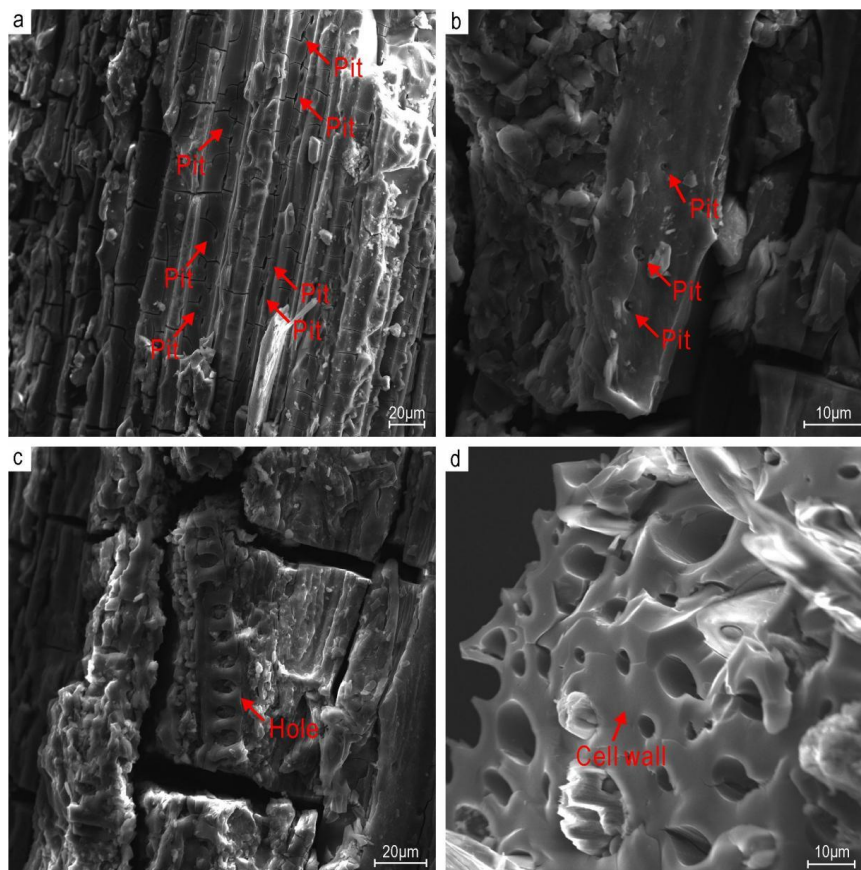

218

219 **Fig. 3** Scanning electron microscope electron probe image of fossilized charcoal. (a-b) Red arrows point to  
220 uniseriate pits. (c) Red arrow points to larger holes in the cell wall that may represent pits, which were  
221 diagenetically enlarged during charring. (d) Red arrow points to homogenized cell wall.

#### 222 **4.3 The Gzhelian wildfire record in geologic context**

223 Published wildfire records for the Gzhelian were compiled in Table S1. Based on the type of  
224 evidence these can be divided into five groups: 23 records of charcoal type I (79.4% of the total  
225 records), two records of charcoal type II (6.9%), one record of pyrogenic PAHs (3.4%), two records  
226 of charcoal type I and charcoal type II (6.9%), and one record of charcoal type II and pyrogenic  
227 PAHs (3.4%). The published Gzhelian wildfire data ~~were observed in~~ 19 geologic units (or



228 formations), with two record from an unclear unit.

229 All of the 29 reported Gzhelian wildfires have occurred in ~~the~~ lower latitudes (30°N-30°S) (Fig.  
230 9). According to Boucot et al.'s (2013) suggested paleoclimatic classification, the Gzhelian can be  
231 divided into four different paleoclimatic zones: cool temperate, warm temperate, arid and tropical.  
232 The Gzhelian wildfires all occurred in the tropical area (Fig. 9).

## 233 5. Discussion

### 234 5.1 Repeated wildfire in the Gzhelian of the Ordos Basin

235 The origin of the inertinite in coal has been controversial, and it has been suggested that the  
236 fusinite and semifusinite in the inertinite may be produced from fungal degradation of vegetation  
237 tissues in oxidizing environments or influenced by other microbial activities (Beeston, 1987;  
238 Teichmüller, 1989; Varma, 1996; ICCP, 2001). Some semifusinite in coal may also have been  
239 formed during diagenesis (Hudspith and Belcher, 2020). Nevertheless, research suggests that the  
240 fusinite and semifusinite in coal ~~were equivalent to~~ fossil charcoal (Scott and Glasspool, 2007;  
241 Hudspith et al., 2012), which was produced by the incomplete combustion of vegetation by  
242 wildfires (Scott, 2010; Liu et al., 2022). All coal samples from the Taiyuan Formation had low  
243 levels of both macrinite and micrinite (Table 1). Both fusinite and semifusinite preserved complete  
244 cellular structures (Fig. 2), suggesting that the fusinite and semifusinite in the study samples ~~may be~~  
245 products of vegetation combustion.

246 In addition, the low reflectance of the vitrinite in the coal samples, averaging 0.49%, indicated  
247 that the samples were ~~poorly metamorphosed~~, and was not enough to support the claim that the  
248 semifusinite in the samples was due to diagenesis. Experiments had shown that the carbonization  
249 temperature for homogenization of vegetation cell walls needs to be ~~at least~~ higher than 250 - 300  
250 °C (Scott and Jones, 1991; Osterkamp et al., 2017). Obvious homogenization of the cell walls of the

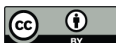

251 fossil charcoal could be observed under the SEM (Fig. 3d), which more clearly suggested that the  
252 fossil charcoal in the samples was caused by wildfire burning. The inertinite content of the Taiyuan  
253 Formation coal samples showed a small range of variability (14.1% - 30.8%) and was dominated by  
254 semifusinite (7.4% - 17.2%), which indicates the presence of frequent small wildfires during this  
255 period. Under the SEM, it can be observed that the cellular structure of the fossil charcoal from the  
256 Taiyuan Formation is obviously broken, and some cellular cavities in the charcoal appeared to have  
257 different degrees of deformation (Fig. 3c), which may be due to the tectonic movement of the strata.

258 Scott (2010) divided wildfires into three types based on their ~~strength~~: surface fire, ground fire,  
259 and crown fire. Among these, surface fires whose fuels are mainly surface herbaceous, shrubs and  
260 various biological wastes, burn at lower temperatures, usually below 400 °C. Ground fires whose  
261 fuel is mainly the dry humus layer in the soil, which can burn thick layers of peat, burn at relatively  
262 high temperatures, up to 600 °C. It has been demonstrated that the reflectance of the inertinite is  
263 positively correlated with the combustion temperature, with higher inertinite reflectance indicating  
264 higher combustion temperatures (Jones et al., 1991; Guo and Bustin, 1998; Scott and Glasspool,  
265 2007; McParland et al., 2009). The reflectance of the inertinite in the Taiyuan Formation samples  
266 varied in a small range (1.01%-2.07%), and it can be inferred that the Taiyuan Formation wildfire  
267 burned at temperatures ranging was about 300 °C to 430 °C, with an average burn temperature of  
268 379 °C (after formula Scott and Glasspool, 2015). This suggests that mainly low-temperature fires  
269 occurred in the Ordos Basin during the Gzhelian (Fig. 4). Wildfire burning may have been fueled  
270 primarily by low-growing vegetation or biological waste, which would be consistent with the  
271 homogenization of fern cell walls observed under the SEM.

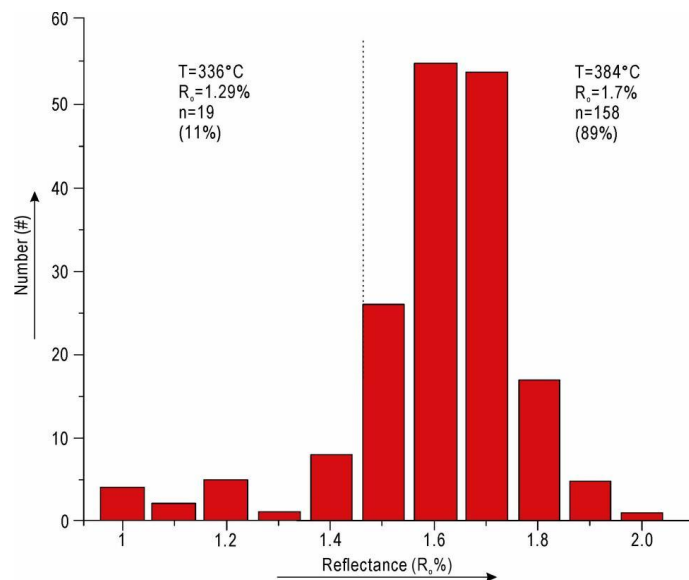

272

273 **Fig. 4** The inertinite reflectance histograms indicate calculated combustion temperatures (Shukla et al., 2023).

#### 274 **5.2 Sources of elemental mercury in coal**

275 Soils are the largest global reservoir of Hg and forest ecosystems are one of the key areas in  
276 the Hg cycle (Wang et al., 2019). Peatland vegetation can retain atmospheric Hg in their bodies by  
277 absorbing it (Grigal, 2003), while humus and sulfides in peatlands have a high affinity for Hg,  
278 which makes them important sinks for Hg (Yudovich and Ketris, 2005; Woerndle et al., 2018). In  
279 the pre-anthropoc era, the main sources of Hg in the surface environment were volcanic eruptions,  
280 intense continental weathering, and wildfires (Pavlish et al., 2003; Pyle and Mather, 2003; Selin,  
281 2009; Shen et al., 2020).

282 In this study, Hg was negatively correlated with Total Organic Carbon (TOC) and Total Sulfur  
283 (TS) (Fig. 6), indicating that Hg is not predominantly present in organic matter and sulfides.  
284 Correlation of elemental concentration with ash yield may provide preliminary information on their  
285 affinity with organic and inorganic (Eskanazy et al., 2010; Kortenski and Sotirov, 2002; Dai et al.,  
286 2012a; Zhang et al., 2023a). Mercury has a relatively high correlation ( $r=0.481$ ) with ash yield,  
287 indicating a dominant inorganic affinity. There was a high correlation between Hg and  $Al_2O_3$  in this



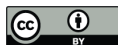

288 study ( $r=0.529$ ), indicating that Hg was mainly enriched in clay minerals (Fig. 6). The Hg  
289 concentrations in coal samples YG-1, YG-10, YG-15, YG-16, and YG-17 (237-352 ppb) were  
290 generally higher than the average concentration of coals from around the world (100 ppb) and the  
291 average concentration of Chinese coals (163 ppb) (Dai et al., 2012b). After normalizing for  $Al_2O_3$ , it  
292 still showed anomalously high values in these five coal samples, indicating that these five Hg peaks  
293 are true Hg anomalies (Fig. 5) (Xie et al., 2022).

294 Xie et al. (2022) demonstrated that wildfire burning resulted in the release of most of the Hg  
295 accumulated in vegetation and soils to the atmosphere, and that atmospheric Hg accumulated  
296 quickly in peatlands, leading to Hg anomalies enrichment in peatlands. Comparing the Hg levels of  
297 the samples in this study with the frequency of wildfires ~~has not shown that~~ the anomalously high  
298 values of Hg ~~are well correlated with the frequency of wildfires~~ (Fig. 5). There were even  
299 anomalously high values of Hg in samples YG-15, YG-16, and YG-17, but the frequency of  
300 wildfires was significantly reduced. This indicates that the anomalous enrichment of Hg in this  
301 study was not caused by wildfire burning.

302 The mass of Hg in forest vegetation is about  $0.1 \text{ mg/m}^2$ , however, the mass of Hg in peatlands  
303 is about  $20 \text{ mg/m}^2$ , which is much greater than the amount in vegetation (Grigal, 2003; Turetsky et  
304 al., 2006). The types of wildfire burning in Xie et al. (2022) were primarily ground and surface fires.  
305 Ground fires were fueled primarily by a dry humus layer in the soil (Scott, 2010), which can burn a  
306 thicker layer of peat, resulting in the release of Hg from the peatland. In this study, the type of  
307 wildfire burning was predominantly surface fires, with the primary fuels for surface fires were low  
308 surface vegetation and biological litter (Scott, 2010), which coincides with the observation of ferns  
309 as fuels in the SEM (Fig. 3). Ku et al. (2018) found that different wildfire intensities had different  
310 effects on Hg volatilization from vegetation. Therefore, wildfire burning may not necessarily lead to



311 Hg enrichment, and wildfire types may not have the same effect on Hg. Mercury enrichment is  
312 favored when wildfires were primarily ground fires, where burning of the peat layer resulted in the  
313 release of large quantities of Hg, which were absorbed by the peatland.

314 Excluding the anomalous enrichment of Hg in coal due to wildfire activities, the known causes  
315 of the anomalous enrichment of Hg in coal are mainly the volcanic activities during the early  
316 peatland accretionary phase that led to the increase of Hg input (Roos-Barraclough et al., 2002;  
317 Yudovich and Ketris, 2005), and the invasion of low-temperature hydrothermal and magmatic fluids  
318 into coal-bearing strata (Sun et al., 2016; Zheng et al., 2018). Zhang et al. (2023a) identified 15  
319 altered volcanic ashes in this study area, demonstrating the frequent volcanic activity during this  
320 depositional time. And it was confirmed that trace element enrichment in **closed** coal seams may be  
321 due to the ~~dipping~~ of tonsteins by acid solutions. Correlation analysis of the Hg content of No. 9  
322 coal with trace elements such as Ga, Zr, and Hf revealed a significant correlation ( $r=0.581-0.705$ ).  
323 Hg enrichment has been widely used as the indicator of volcanic sediment input (Shen et al., 2020),  
324 so the anomalously high values of Hg in the study area may be attributed to the input of Hg  
325 elements due to ~~the frequent volcanic activities at that time~~, and the Hg in the tonsteins was ~~leached~~  
326 ~~into the closing coals~~ by leaching of the acid solution.

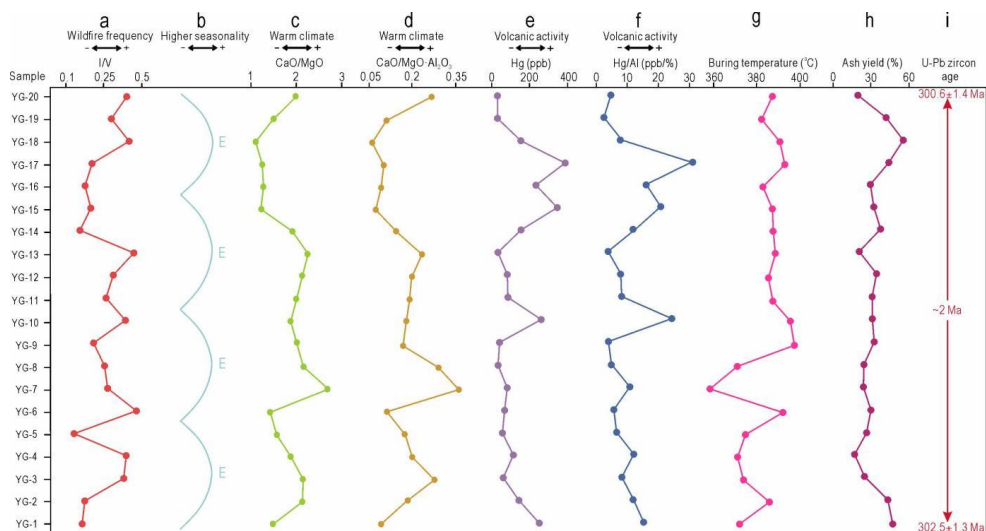

327

328 **Fig. 5** Comprehensive analysis map of No.9 coal in Yaogou Mine. (a) Inertinite/ Vitrinite variations in 20 coal  
 329 samples. (b) Long eccentricity orbital cycle variation. (c) CaO/MgO trends in 20 coal samples. (d)  
 330 CaO/MgO · Al<sub>2</sub>O<sub>3</sub> trends in 20 coal samples. (e) Hg content trends in 20 coal samples. (f) Hg/Al trends in 20 coal  
 331 samples. (g) Combustion temperature trends in 20 coal samples. (h) Ash yield trends in 20 coal samples. (i) Age of  
 332 No. 9 coal, referred to Zhang et al. (2023a).

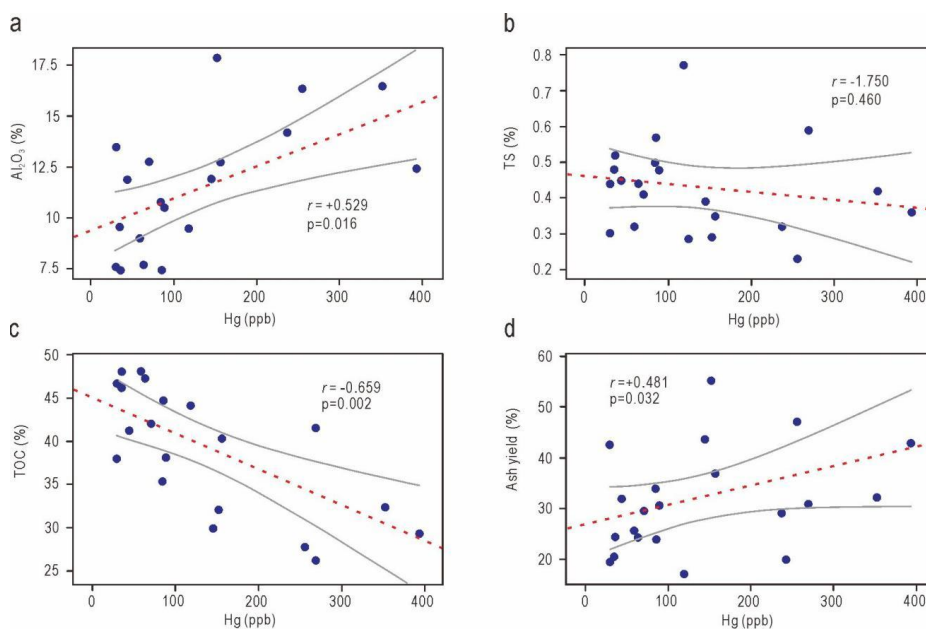

333

334 **Fig. 6** (a) Correlation between Hg and Al<sub>2</sub>O<sub>3</sub>. (b) Correlation between Hg and TS. (c) Correlation between Hg and  
 335 TOC. (d) Correlation between Hg and Ash yield.



335 TOC. (d) Correlation between Hg and ash yield. Spearman's P and r values are shown. Red lines denote the  
336 best-fit linear regression line. Gray curve lines denote the 95% confidence interval.

### 337 ***5.3 Gzhelian wildfires and climate change***

#### 338 ***5.3.1 Regional wildfire trends***

339 Wildfire activity during geologic history has been influenced primarily by changes in  
340 atmospheric oxygen levels, climate and vegetation (Belcher and Hudspith, 2017; Baker, 2022). For  
341 example, Glasspool and Scott (2010) suggested that high levels of oxygen in the atmosphere  
342 ~~influence~~ increased wildfire activity on different time scales. Baker (2022) found that past periods  
343 of global climate change on Earth have been accompanied by increased wildfire activity. Vegetation  
344 type changes also influence wildfire occurrence, for example, the rise of angiosperms during the  
345 Cretaceous may have led to an increase in wildfire activity at that time (Lü et al., 2024).

346 The level of oxygen in the atmosphere plays a key role in the occurrence of wildfires (Scott,  
347 2000); when oxygen levels are below 15% it will not be possible to sustain vegetation burning, and  
348 when levels are above 23% humid vegetation will continue to burn. Based on model predictions, the  
349 oxygen level of 24.6% in the Gzhelian is higher than current oxygen levels and can sustain wildfire  
350 burning in humidter environments (Fig. 7).

351 CaO/MgO can be used as an indicator for paleoclimate reconstruction (Chen and Wan, 1999;  
352 Sun et al., 2010; Liu et al., 2013; Fu et al., 2018), and the ratio of  $\text{CaO/MgO} \cdot \text{Al}_2\text{O}_3$  ~~can more~~  
353 ~~sensitively respond to the~~ temperature changes ~~at that time~~, with high values ~~indicated for~~ warm  
354 periods, and low values ~~indicated for~~ cold periods (Chen and Wan, 1999; Fu et al., 2018; Zhang et  
355 al., 2020b; Zhang et al., 2021). In this study, periods of high wildfire frequency (e.g., YG-10, YG-11,  
356 YG-12, YG-13) had higher values of CaO/MgO and  $\text{CaO/MgO} \cdot \text{Al}_2\text{O}_3$ , ~~indicated~~ of a warm and  
357 humid climate (Fig. 5). Periods of lower wildfire frequency (e.g., YG-14, YG-15, YG-16, YG-17)



358 had lower CaO/MgO and CaO/MgO • Al<sub>2</sub>O<sub>3</sub> values, ~~indicated~~ a cold and dry climate (Fig. 5).  
359 Although wildfires were more easily caused when the climate was dry, cold climates with lower  
360 temperatures were not favourable for vegetation development (Brovkin, 2002), and a ~~dryer~~ climate  
361 meant less rainfall, both of which led to a decrease in fuels, ~~hence a~~ less frequent occurrence of  
362 wildfires. However, in warm and humid climatic periods, where seasonal variations were stronger,  
363 sufficient rainfall and suitable temperatures promote the development of vegetation, leading to a  
364 significant accumulation of fuels, hence more favourable for wildfires to occur (Litt et al., 2014;  
365 Stockhecke et al., 2016; Swain, 2021). Furthermore, previous research has found that high  
366 frequencies of wildfire activity have occurred in moderately humid environments (Daniau et al,  
367 2012; Marlon et al, 2013). This study predicts oxygen levels sufficient to sustain wildfires in humid  
368 conditions for sustained burning, so sufficient fuel accumulation may have been a major factor in  
369 the frequency of wildfires during this period.

370 Many scholars have examined charcoal abundance changes in Quaternary sediments to show  
371 that orbital cycle forcing climate drives wildfire activity (Verardo and Ruddiman, 1996; Thevenon  
372 et al., 2004; Zhou et al., 2007; Daniau et al., 2013, 2023; Kappenberg et al., 2019; Hao et al., 2020;  
373 Shi et al., 2020; Zhang et al., 2023b). Zhou et al. (2023), based on a high-resolution charcoal  
374 fragment record from the Wushan Basin of the Tibetan Plateau during the Middle Miocene, found  
375 that orbital period (short eccentricity, slope, and age difference) forced climate change to control  
376 wildfire activity by influencing the amount of vegetative fuels and their combustibility. In this study,  
377 Coal 9 has a floor age of  $300.6 \pm 1.4$  Ma, a roof age of  $302.5 \pm 1.3$  Ma, and a **depositional age** of  
378  $\sim 1.9$  Ma (Zhang et al., 2023a). We explored the effect of the orbital cycle on wildfires using long  
379 eccentricity. As shown in Fig. 5(b-d), the variation of the long eccentricity had a good correlation  
380 with our climatic indicators (CaO/MgO, CaO/MgO • Al<sub>2</sub>O<sub>3</sub>). ~~The maximum~~ eccentricity is



381 associated with a warmer and more humid period, while ~~the~~ minimum eccentricity is associated  
382 with a colder and dryer period. When the orbital cycle eccentricity is at maximum, the sun was at  
383 perihelion ~~and the amount of~~ insolation ~~was relatively abundant,~~ leading to a sufficient  
384 accumulation of fuels, which in turn led to an increase in wildfire activity (Kappenberg et al., 2019;  
385 Hollaar et al., 2021; Qiu et al., 2023; Zhang et al., 2023b). This is consistent with the study by  
386 Kappenberg et al. (2019) who found that orbital forcing leads to peak wildfire activity during warm  
387 and humid periods.

388 Combined with the above research, the factors controlling wildfires in this study area are  
389 shown in Fig. 8. When the eccentricity was at a minimum, the Earth received insufficient insolation,  
390 the climate was cold and dry, and seasonal variations were not evident (Hollaar et al., 2021; Huang  
391 et al., 2024). The lack of suitable environments for survival at that time resulted ~~the low amount of~~  
392 vegetation. There may have been a low frequency of wildfires occurring at this stage, which  
393 produced less charcoal preserved in the peatland (Fig. 8a). When the eccentricity was at a maximum,  
394 the Earth received sufficient insolation, the climate was warm and humid, and seasonal variations  
395 were evident (Hollaar et al., 2021; Huang et al., 2024). Suitable environments lead to the  
396 proliferation of vegetation, which in turn accumulate large amounts of fuel. More rainfall was also  
397 followed by more lightning, leading to increased chances of ignition. Thus there were more frequent  
398 wildfires during the period, which produced more charcoal preserved in the peatlands (Fig. 8b). In  
399 this study, intensive wildfires did not correlate to peaks in Hg concentrations, and the anomalous  
400 enrichment of Hg was most likely due to the frequent volcanic activity occurring at that time. When  
401 ~~the volcano erupts,~~ the ash can carry large Hg transport (Coufalik et al., 2018). When volcanic ash  
402 ~~passes through~~ peatlands, the Hg it carried naturally settles and the strong adsorption of Hg by  
403 peatlands leads to anomalous enrichment of Hg at that time (Fig. 8a) (Yudovich and Ketris, 2005).

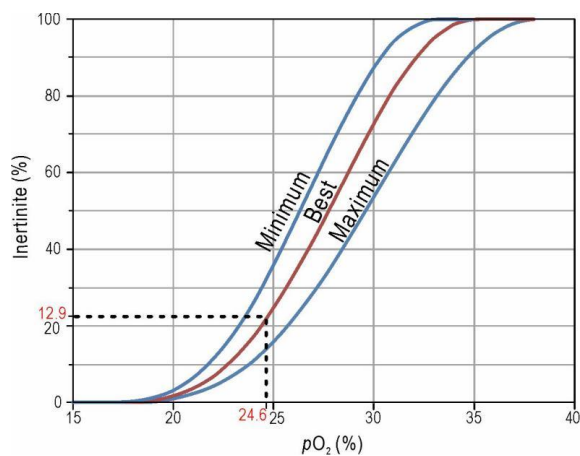

404

405 **Fig. 7** The atmospheric oxygen concentration during the Late Carboniferous Taiyuan Formation in the Ordos

406 Basin based on the prediction model proposed by Glasspool et al. (2015).

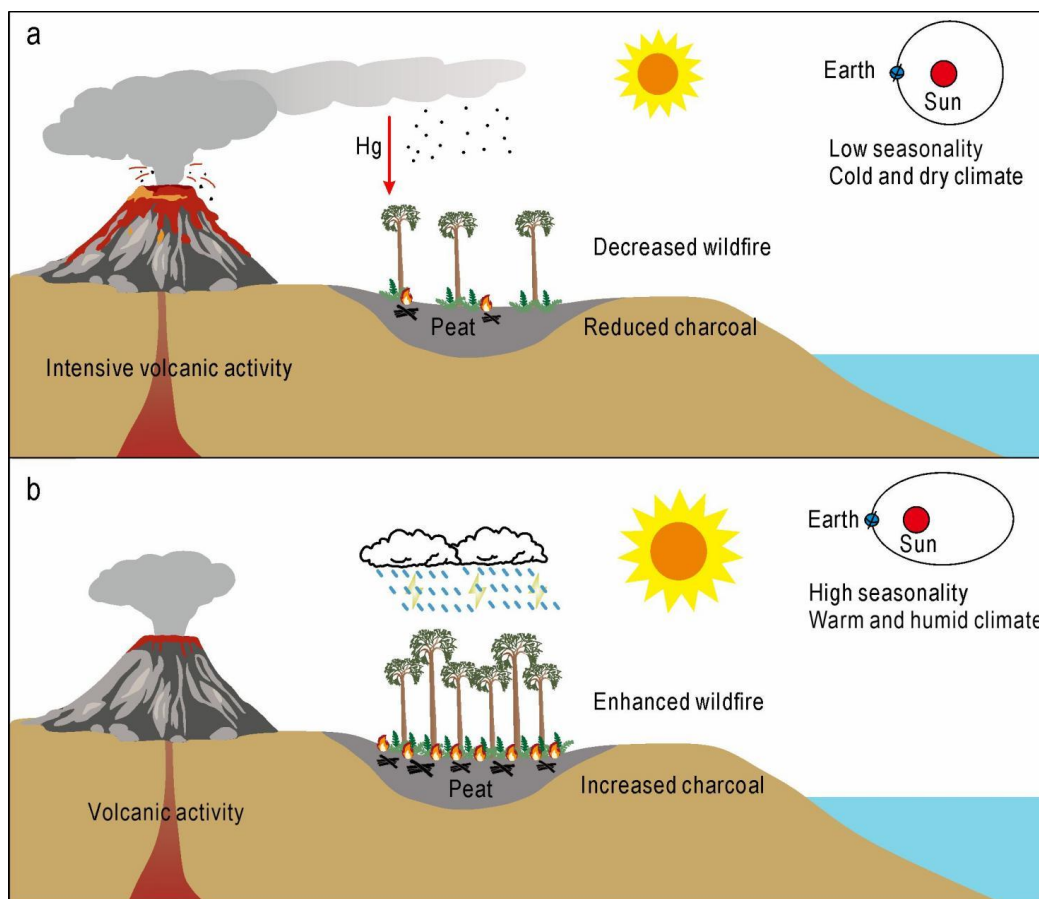

407

408 **Fig. 8** Illustration of wildfires activity forced by the long eccentricity orbital cycle in the study area.



409 **5.3.2 The geographical distribution of published evidence in the Gzhelian**

410 The distribution of wildfires on Earth is not random, and the spatial distribution of wildfires in  
411 the modern world is affected by vegetation, climate, topography, and human activities (Krawchuk et  
412 al., 2009). Studies have shown that frequent wildfires in modern environments mainly occur in  
413 tropical forests and savannas (Mouillot and Field, 2005; Giglio et al., 2006; Flannigan et al., 2009,  
414 2013). In this study, based on the distribution of climate zones published by Boucot et al. (2013), it  
415 was found that all of the wildfire records for the Gzhelian occurred in the tropical climate zone (Fig.  
416 9). ~~It was~~ similar to the modern distribution of wildfires. In the tropics of the Gzhelian, different  
417 biomes are distributed, mainly divided into humid to semi-humid wetland groups and semi-humid  
418 to semi-arid wetland groups, and the peatlands were under alternating humid and dry changing  
419 environments (DiMichele et al., 2010; DiMichele, 2014). In warm and humid environments,  
420 vegetation ~~grows densely~~ and generates large fuel accumulations. ~~And in~~ arid environments, fuel  
421 burnability is enhanced, which in turn promotes more frequent wildfires (Denis et al., 2017; Baker,  
422 2022). Hence ~~the frequent occurrence of~~ wildfires in the tropics ~~with~~ alternating seasons.

423 ~~In view of the spatial distribution,~~ the Gzhelian wildfire records were all located at low  
424 latitudes near the equator. In the Gzhelian, the southern part of the Gondwana was covered by a  
425 large ice sheet, resulting in the lack of vegetation and the lack of fuel needed for wildfires to burn  
426 (Scotese, 2021) (Fig. 9). Similarly ~~in~~ the northern part of the Gondwana and the northern part of the  
427 Laurasia there were extensive arid climate zones spread across the mainland that lacked the fuels  
428 needed for wildfire burning, resulting in the absence of wildfire records (Fig. 9). However, it is  
429 worth noting that widespread biases, such as taphonomy, research preferences, and sampling bias,  
430 may result in ~~global wildfire data for the Gzhelian not representing the true situation at that time~~  
431 (Brown et al., 2012; Hamad et al., 2012; Lu et al., 2021; Lü et al., 2024). For example, this study





432 found no evidence of wildfires that have been reported in warm temperate regions (Fig. 9).

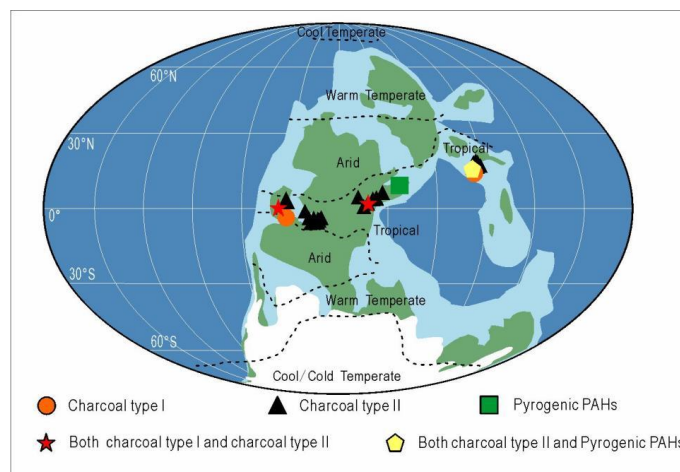

433

434 **Fig. 9** Paleogeographic distribution of published wildfire occurrences during the Gzhelian. Plate reconstructions  
435 from Scotese (2016) with paleoclimatic zones based on Boucot et al. (2013).

## 436 6. Conclusion

437 In this study, the detailed analysis of the inertinite in the No. 9 coal of the Yaogou coal mine in  
438 the Ordos Basin, China, demonstrated that frequent wildfires ~~had~~ occurred in the region during the  
439 Gzhelian ~~of the Late Carboniferous~~ and were mainly low-temperature fires. The frequency of  
440 wildfires during this period may be related to the forcing of the long eccentricity orbital cycle,  
441 where changes in the climate due to changes in the orbital cycle affect the fuel load. The review of  
442 the global wildfire record of the Gzhelian that wildfires were concentrated in low-latitude tropical  
443 climates, and the distribution of wildfires may have been limited by the climate and fuels available  
444 at that time. The anomalous enrichment of Hg in No. 9 coal was probably due to inputs of Hg from  
445 the frequent volcanic activity occurring at that time, and was not related to wildfire burning. The  
446 different types of wildfire burning may limit the release and enrichment of Hg.

## 447 Author Contribution

448 All the authors have actively participated in the preparation of the manuscript. Wenxu Du was



449 responsible for data curation, methodology, and writing; Dawei Lv was responsible for funding  
450 acquisition, project administration, and supervision; Zihui Zhang was responsible for funding  
451 acquisition and methodology; Munira Raji was responsible for review; Cuiyu Song was responsible  
452 for conceptualization and methodology; Luojing Wang was responsible for visualization and  
453 investigation; Zekuan Li was responsible for investigation; Kai Cao was responsible for software  
454 and validation; Ruoxiang Yuan was responsible for visualization and investigation; Yuzhuang Sun  
455 was responsible for review. All authors read and approved the final proof.

#### 456 **Competing Interests**

457 The authors declare that they have no conflict of interest.

#### 458 **Acknowledgement**

459 This work was financially supported by the National Natural Science Foundation of China  
460 (Grant No. 42102127) and the Natural Science Foundation of Shandong Province (Grant No.  
461 ZR2021QD087), Shandong University of Science and Technology (Grant No. 2018TDJH101). We  
462 think the Deep-Time Digital Earth program (DDE) to support this work. We thank Jincheng Xu to  
463 helped with this study. We gratefully acknowledge Professor James C. Hower for his valuable  
464 comments on this paper.

#### 465 **References**

466 Ao, W., Huang, W., Weng, C., Xiao, X., Liu, D., Tang, X., Chen, P., Zhao, Z., Wan, H., and  
467 Finkelman, R. B.: Coal petrology and genesis of Jurassic coal in the Ordos Basin, China,  
468 *Geoscience Frontiers*, 3, 85-95, <https://doi.org/10.1016/j.gsf.2011.09.004>, 2012.

469 Baker, S. J.: Fossil evidence that increased wildfire activity occurs in tandem with periods of global  
470 warming in Earth's past, *Earth-Science Reviews*, 224, 103871,  
471 <https://doi.org/10.1016/j.earscirev.2021.103871>, 2022.



- 472 Beeston, J.: Organic petrology of liptinites in the denison trough, Queensland, The APPEA Journal,  
473 27, 86-97, <https://doi.org/10.1071/AJ86009>, 1987.
- 474 Belcher, C. M., and Hudspith, V. A.: Changes to Cretaceous surface fire behaviour influenced the  
475 spread of the early angiosperms, New Phytologist, 213, 1521-1532,  
476 <https://doi.org/10.1111/nph.14264>, 2017.
- 477 Berner, R. A.: The long-term carbon cycle, fossil fuels and atmospheric composition, Nature, 426,  
478 323-326, <https://doi.org/10.1038/nature02131>, 2003.
- 479 Boucot, A. J., Xu, C., Scotese, C. R., and Morley, R. J.: Phanerozoic paleoclimate: an atlas of  
480 lithologic indicators of climate, SEPM (Society for Sedimentary Geology) Tulsa, OK,  
481 <https://doi.org/10.2110/sepmcsp.11>, 2013.
- 482 Brovkin, V.: Climate-vegetation interaction, Journal de Physique IV (Proceedings), 57-72,  
483 <https://doi.org/10.1051/jp4:20020452>, 2002.
- 484 Brown, S. A., Scott, A. C., Glasspool, I. J., and Collinson, M. E.: Cretaceous wildfires and their  
485 impact on the Earth system, Cretaceous research, 36, 162-190,  
486 <https://doi.org/10.1016/j.cretres.2012.02.008>, 2012.
- 487 Carlquist, S., and Schneider, E. L.: Vessels in ferns: structural, ecological, and evolutionary  
488 significance, American Journal of Botany, 88, 1-13, <https://doi.org/10.2307/2657121>, 2001.
- 489 Chen, J. a., and Wan, G.: Sediment particle size distribution and its environmental significance in  
490 Lake Erhai, Yunnan Province, Chinese Journal of Geochemistry, 18, 314-320,  
491 <https://doi.org/10.1007/bf03052905>, 1999.
- 492 Cheng, T., Zou, J., Shi, X., Gorbarenko, S., Vasilenko, Y., Bosin, A., Liu, Y., Chen, B., and Cheng,  
493 F.: Climate-driven changes in high-intensity wildfire on orbital timescales in Eurasia since 320  
494 Ka, Lithosphere, <https://doi.org/10.2113/2022/7562666>, 2022.



- 495 Coufalík, P., Krmíček, L., Zvěřina, O., Meszarosová, N., Hladil, J., and Komárek, J.: Model of  
496 mercury flux associated with volcanic activity, *Bulletin of environmental contamination and*  
497 *toxicology*, 101, 549-553, <https://doi.org/10.1007/s00128-018-2430-5>, 2018.
- 498 Dai, S., Ren, D., Chou, C.-L., Li, S., and Jiang, Y.: Mineralogy and geochemistry of the no. 6 coal  
499 (Pennsylvanian) in the Junger Coalfield, Ordos Basin, China, *International Journal of Coal*  
500 *Geology*, 66, 253-270, <https://doi.org/10.1016/j.coal.2005.08.003>, 2006.
- 501 Dai, S., Li, D., Chou, C.-L., Zhao, L., Zhang, Y., Ren, D., Ma, Y., and Sun, Y.: Mineralogy and  
502 geochemistry of boehmite-rich coals: new insights from the Haerwusu Surface Mine, Jungar  
503 Coalfield, Inner Mongolia, China, *International journal of coal geology*, 74, 185-202,  
504 <https://doi.org/10.1016/j.coal.2008.01.001>, 2008.
- 505 Dai, S., Jiang, Y., Ward, C. R., Gu, L., Seredin, V. V., Liu, H., Zhou, D., Wang, X., Sun, Y., and Zou,  
506 J.: Mineralogical and geochemical compositions of the coal in the Guanbanwusu Mine, Inner  
507 Mongolia, China: Further evidence for the existence of an Al (Ga and REE) ore deposit in the  
508 Jungar Coalfield, *International Journal of Coal Geology*, 98, 10-40,  
509 <https://doi.org/10.1016/j.coal.2012.03.003>, 2012a.
- 510 Dai, S., Ren, D., Chou, C.-L., Finkelman, R. B., Seredin, V. V., and Zhou, Y.: Geochemistry of trace  
511 elements in Chinese coals: A review of abundances, genetic types, impacts on human health,  
512 and industrial utilization, *International Journal of Coal Geology*, 94, 3-21,  
513 <https://doi.org/10.1016/j.coal.2011.02.003>, 2012b.
- 514 Daniau, A.-L., Sánchez Goñi, M. F., Martinez, P., Urrego, D. H., Bout-Roumazielles, V., Desprat, S.,  
515 and Marlon, J. R.: Orbital-scale climate forcing of grassland burning in southern Africa,  
516 *Proceedings of the National Academy of Sciences*, 110, 5069-5073,  
517 <https://doi.org/10.1073/pnas.1214292110>, 2013.



- 518 Daniau, A.-L., Loutre, M.-F., Swingedouw, D., Laepple, T., Bassinot, F., Malaizé, B., Kageyama,  
519 M., Charlier, K., and Carfantan, H.: Precession and obliquity forcing of the South African  
520 monsoon revealed by sub-tropical fires, *Quaternary Science Reviews*, 310, 108128,  
521 <https://doi.org/10.1016/j.quascirev.2023.108128>, 2023.
- 522 Daniau, A. L., Bartlein, P. J., Harrison, S., Prentice, I. C., Brewer, S., Friedlingstein, P.,  
523 Harrison-Prentice, T., Inoue, J., Izumi, K., and Marlon, J.: Predictability of biomass burning in  
524 response to climate changes, *Global Biogeochemical Cycles*, 26,  
525 <https://doi.org/10.1029/2011GB004249>, 2012.
- 526 Denis, E. H., Pedentchouk, N., Schouten, S., Pagani, M., and Freeman, K. H.: Fire and ecosystem  
527 change in the Arctic across the Paleocene-Eocene Thermal Maximum, *Earth and Planetary  
528 Science Letters*, 467, 149-156, <https://doi.org/10.1016/j.epsl.2017.03.021>, 2017.
- 529 Diessel, C. F.: The stratigraphic distribution of inertinite, *International Journal of Coal Geology*, 81,  
530 251-268, <https://doi.org/10.1016/j.coal.2009.04.004>, 2010.
- 531 DiMichele, W. A., and Phillips, T. L.: The ecology of Paleozoic ferns, *Review of Palaeobotany and  
532 Palynology*, 119, 143-159, [https://doi.org/10.1016/s0034-6667\(1\)00134-8](https://doi.org/10.1016/s0034-6667(1)00134-8), 2002.
- 533 DiMichele, W. A.: Wetland-dryland vegetational dynamics in the Pennsylvanian ice age tropics,  
534 *International Journal of Plant Sciences*, 175, 123-164, <https://doi.org/10.1086/675235>, 2014.
- 535 Eskanazy, G., Finkelman, R. B., and Chattarjee, S.: Some considerations concerning the use of  
536 correlation coefficients and cluster analysis in interpreting coal geochemistry data,  
537 *International Journal of Coal Geology*, 83, 491-493, <https://doi.org/10.1016/j.coal.2010.05.006>,  
538 2010.
- 539 Flannigan, M., Cantin, A. S., De Groot, W. J., Wotton, M., Newbery, A., and Gowman, L. M.:  
540 Global wildland fire season severity in the 21st century, *Forest Ecology and Management*, 294,



- 541 54-61, <https://doi.org/10.1016/j.foreco.2012.10.022>, 2013.
- 542 Flannigan, M. D., Krawchuk, M. A., de Groot, W. J., Wotton, B. M., and Gowman, L. M.:
- 543 Implications of changing climate for global wildland fire, *International journal of wildland fire*,
- 544 18, 483-507, <https://doi.org/10.1071/wf08187>, 2009.
- 545 Giglio, L., Van der Werf, G., Randerson, J., Collatz, G., and Kasibhatla, P.: Global estimation of
- 546 burned area using MODIS active fire observations, *Atmospheric Chemistry and Physics*, 6,
- 547 957-974, <https://doi.org/10.5194/acp-6-957-2006>, 2006.
- 548 Glasspool, I. J., and Scott, A. C.: Phanerozoic concentrations of atmospheric oxygen reconstructed
- 549 from sedimentary charcoal, *Nature Geoscience*, 3, 627-630, <https://doi.org/10.1038/ngeo923>,
- 550 2010.
- 551 Glasspool, I. J., Scott, A. C., Waltham, D., Pronina, N., and Shao, L.: The impact of fire on the Late
- 552 Paleozoic Earth system, *Frontiers in Plant Science*, 6, 756,
- 553 <https://doi.org/10.3389/fpls.2015.00756>, 2015.
- 554 Grigal, D.: Mercury sequestration in forests and peatlands: a review, *Journal of environmental*
- 555 *quality*, 32, 393-405, <https://doi.org/10.2134/jeq2003.0393>, 2003.
- 556 Guo, Y., and Bustin, R.: FTIR spectroscopy and reflectance of modern charcoals and fungal
- 557 decayed woods: implications for studies of inertinite in coals, *International Journal of Coal*
- 558 *Geology*, 37, 29-53, [https://doi.org/10.1016/s0166-5162\(98\)00019-6](https://doi.org/10.1016/s0166-5162(98)00019-6), 1998.
- 559 Hamad, A. M. A., Jasper, A., and Uhl, D.: The record of Triassic charcoal and other evidence for
- 560 palaeo-wildfires: signal for atmospheric oxygen levels, taphonomic biases or lack of fuel?,
- 561 *International Journal of Coal Geology*, 96, 60-71, <https://doi.org/10.1016/j.coal.2012.03.006>,
- 562 2012.
- 563 Hao, Y., Han, Y., An, Z., and Burr, G. S.: Climatic control of orbital time-scale wildfire occurrences

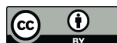

564 since the late MIS 3 at Qinghai Lake, monsoon marginal zone, Quaternary international, 550,  
565 20-26, <https://doi.org/10.1016/j.quaint.2020.03.002>, 2020.

566 Hollaar, T. P., Baker, S. J., Hesselbo, S. P., Deconinck, J.-F., Mander, L., Ruhl, M., and Belcher, C.  
567 M.: Wildfire activity enhanced during phases of maximum orbital eccentricity and precessional  
568 forcing in the Early Jurassic, Communications Earth & Environment, 2, 247,  
569 <https://doi.org/10.1038/s43247-021-00307-3>, 2021.

570 Hou, H., Shao, L., Liang, G., Tang, Y., Zhang, H., and Zhang, J.: Repeated wildfires in the middle  
571 jurassic Xishanyao formation (aalenian and bajocian ages) in northwestern China, Acta  
572 Geologica Sinica-English Edition, 96, 1752-1763, <https://doi.org/10.1111/1755-6724.14912>,  
573 2022.

574 Hower, J. C., Eble, C. F., Hopps, S. D., and Morgan, T. D.: Aspects of rare earth element  
575 geochemistry of the Pond Creek coalbed, Pike County, Kentucky, International Journal of Coal  
576 Geology, 261, 104082, <https://doi.org/10.1016/j.coal.2022.104082>, 2022.

577 Huang, H., Fang, Q., Huang, W., Shi, M., Zhang, S., Yang, T., Li, H., and Wu, H.: A short-term  
578 warming interval during the apex of the late Paleozoic Ice Age: Evidence from geochemical  
579 and magnetic records from South China, Palaeogeography, Palaeoclimatology, Palaeoecology,  
580 112178, <https://doi.org/10.1016/j.palaeo.2024.112178>, 2024.

581 Hudspith, V., Scott, A., Collinson, M., Pronina, N., and Beeley, T.: Evaluating the extent to which  
582 wildfire history can be interpreted from inertinite distribution in coal pillars: An example from  
583 the Late Permian, Kuznetsk Basin, Russia, International Journal of Coal Geology, 89, 13-25,  
584 <https://doi.org/10.1016/j.coal.2011.07.009>, 2012.

585 Hudspith, V. A., and Belcher, C. M.: Some semifusinite in coal may form during diagenesis, not  
586 wildfires, International Journal of Coal Geology, 218, 103360,



- 587 <https://doi.org/10.1016/j.coal.2019.103360>, 2020.
- 588 Jasper, A., Guerra-Sommer, M., Hamad, A. M. A., Bamford, M., Bernardes-de-Oliveira, M. E. C.,  
589 Tewari, R., and Uhl, D.: The burning of Gondwana: Permian fires on the southern continent—  
590 A palaeobotanical approach, *Gondwana Research*, 24, 148-160,  
591 <https://doi.org/10.1016/j.gr.2012.08.017>, 2013.
- 592 Jasper, A., Pozzebon-Silva, Â., Carniere, J. S., and Uhl, D.: Palaeozoic and Mesozoic  
593 palaeo-wildfires: An overview on advances in the 21st Century, *Journal of Palaeosciences*, 70,  
594 159-172, <https://doi.org/10.54991/jop.2021.13>, 2021.
- 595 Jinhua, F., Shixiang, L., Liming, X., and Xiaobing, N.: Paleo-sedimentary environmental restoration  
596 and its significance of Chang 7 Member of Triassic Yanchang Formation in Ordos Basin, NW  
597 China, *Petroleum Exploration and Development*, 45, 998-1008,  
598 [https://doi.org/10.1016/s1876-3804\(18\)30104-6](https://doi.org/10.1016/s1876-3804(18)30104-6), 2018.
- 599 Jones, T. P., and Chaloner, W. G.: Fossil charcoal, its recognition and palaeoatmospheric  
600 significance, *Palaeogeography, Palaeoclimatology, Palaeoecology*, 97, 39-50,  
601 [https://doi.org/10.1016/0031-0182\(91\)90180-y](https://doi.org/10.1016/0031-0182(91)90180-y), 1991.
- 602 Jones, T. P.: Fusain in late jurassic sediments from the witch ground graben, North sea, UK, in: 4th  
603 European Palaeobotanical and Palynological Conference, Heerlen/Kerkrade, The Netherlands,  
604 19-23 September 1994, 99-104, 1997.
- 605 Kappenberg, A., Lehndorff, E., Pickarski, N., Litt, T., and Amelung, W.: Solar controls of fire  
606 events during the past 600,000 years, *Quaternary Science Reviews*, 208, 97-104,  
607 <https://doi.org/10.1016/j.quascirev.2019.02.008>, 2019.
- 608 Kortenski, J., and Sotirov, A.: Trace and major element content and distribution in Neogene lignite  
609 from the Sofia Basin, Bulgaria, *International Journal of Coal Geology*, 52, 63-82,





- 610 [https://doi.org/10.1016/s0166-5162\(02\)00133-7](https://doi.org/10.1016/s0166-5162(02)00133-7), 2002.
- 611 Krawchuk, M. A., Moritz, M. A., Parisien, M.-A., Van Dorn, J., and Hayhoe, K.: Global  
612 pyrogeography: the current and future distribution of wildfire, *PloS one*, 4, e5102,  
613 <https://doi.org/10.1371/journal.pone.0005102>, 2009.
- 614 Ku, P., Tsui, M. T.-K., Nie, X., Chen, H., Hoang, T. C., Blum, J. D., Dahlgren, R. A., and Chow, A.  
615 T.: Origin, reactivity, and bioavailability of mercury in wildfire ash, *Environmental science &*  
616 *technology*, 52, 14149-14157, <https://doi.org/10.1021/acs.est.8b03729>, 2018.
- 617 Li, Y., Tang, D., Wu, P., Niu, X., Wang, K., Qiao, P., and Wang, Z.: Continuous unconventional  
618 natural gas accumulations of Carboniferous-Permian coal-bearing strata in the Linxing area,  
619 northeastern Ordos basin, China, *Journal of Natural Gas Science and Engineering*, 36, 314-327,  
620 <https://doi.org/10.1016/j.jngse.2016.10.037>, 2016.
- 621 Litt, T., Pickarski, N., Heumann, G., Stockhecke, M., and Tzedakis, P. C.: A 600,000 year long  
622 continental pollen record from Lake Van, eastern Anatolia (Turkey), *Quaternary Science*  
623 *Reviews*, 104, 30-41, <https://doi.org/10.1016/j.quascirev.2014.03.017>, 2014.
- 624 Liu, B., Jin, H., Sun, L., Sun, Z., and Su, Z.: Winter and summer monsoonal evolution in  
625 northeastern Qinghai-Tibetan Plateau during the Holocene period, *Geochemistry*, 73, 309-321,  
626 <https://doi.org/10.1016/j.chemer.2013.03.006>, 2013.
- 627 Liu, B., Spiekermann, R., Zhao, C., Puettmann, W., Sun, Y., Jasper, A., and Uhl, D.: Evidence for  
628 the repeated occurrence of wildfires in an upper Pliocene lignite deposit from Yunnan, SW  
629 China, *International Journal of Coal Geology*, 250, 103924,  
630 <https://doi.org/10.1016/j.coal.2021.103924>, 2022.
- 631 Lü, D.-W., Du, W.-X., Zhang, Z.-H., Gao, Y., Wang, T.-T., Xu, J.-C., Zhang, A.-C., and Wang, C.-S.:  
632 A synthesis of the Cretaceous wildfire record related to atmospheric oxygen levels?, *Journal of*



- 633 Palaeogeography, 13, 149-164, <https://doi.org/10.1016/j.jop.2023.10.001>, 2024.
- 634 Lu, M., Ikejiri, T., and Lu, Y.: A synthesis of the Devonian wildfire record: Implications for  
635 paleogeography, fossil flora, and paleoclimate, *Palaeogeography, Palaeoclimatology,*  
636 *Palaeoecology*, 571, 110321, <https://doi.org/10.1016/j.palaeo.2021.110321>, 2021.
- 637 Marlon, J. R., Bartlein, P. J., Daniau, A.-L., Harrison, S. P., Maezumi, S. Y., Power, M. J., Tinner, W.,  
638 and Vanni re, B.: Global biomass burning: a synthesis and review of Holocene paleofire  
639 records and their controls, *Quaternary Science Reviews*, 65, 5-25,  
640 <https://doi.org/10.1016/j.quascirev.2012.11.029>, 2013.
- 641 McParland, L. C., Collinson, M. E., Scott, A. C., and Campbell, G.: The use of reflectance values  
642 for the interpretation of natural and anthropogenic charcoal assemblages, *Archaeological and*  
643 *Anthropological Sciences*, 1, 249-261, <https://doi.org/10.1007/s12520-009-0018-z>, 2009.
- 644 Mouillot, F., and Field, C. B.: Fire history and the global carbon budget: a  $1 \times 1$  fire history  
645 reconstruction for the 20th century, *Global Change Biology*, 11, 398-420,  
646 <https://doi.org/10.1111/j.1365-2486.2005.00920.x>, 2005.
- 647 Osterkamp, I. C., Lara, D. M. d., Gonalves, T. A. P., Kauffmann, M., P rico, E., St lp, S.,  
648 Machado, N. T. G., Uhl, D., and Jasper, A.: Changes of wood anatomical characters of selected  
649 species of *Araucaria*-during artificial charring-implications for palaeontology, *Acta Botanica*  
650 *Brasilica*, 32, 198-211, <https://doi.org/10.1590/0102-33062017abb0360>, 2017.
- 651 Pavlish, J. H., Sondreal, E. A., Mann, M. D., Olson, E. S., Galbreath, K. C., Laudal, D. L., and  
652 Benson, S. A.: Status review of mercury control options for coal-fired power plants, *Fuel*  
653 *processing technology*, 82, 89-165, [https://doi.org/10.1016/S0378-3820\(03\)00059-6](https://doi.org/10.1016/S0378-3820(03)00059-6), 2003.
- 654 Petersen, H. I., and Lindstr m, S.: Synchronous wildfire activity rise and mire deforestation at the  
655 Triassic-Jurassic boundary, <https://doi.org/10.1371/journal.pone.0047236>, 2012.



- 656 Presswood, S. M., Rimmer, S. M., Anderson, K. B., and Filiberto, J.: Geochemical and petrographic  
657 alteration of rapidly heated coals from the Herrin (No. 6) Coal Seam, Illinois Basin,  
658 International Journal of Coal Geology, 165, 243-256,  
659 <https://doi.org/10.1016/j.coal.2016.08.022>, 2016.
- 660 Pyle, D. M., and Mather, T. A.: The importance of volcanic emissions for the global atmospheric  
661 mercury cycle, Atmospheric Environment, 37, 5115-5124,  
662 <https://doi.org/10.1016/j.atmosenv.2003.07.011>, 2003.
- 663 Qiu, R., Fang, L., Lv, P., Jiang, F., Zhang, X., Zhang, X., Zhang, P., Zhu, L., and Shi, S.: Long  
664 eccentricity forcing of the Late Pliensbachian to Early Toarcian (Jurassic) terrestrial wildfire  
665 activities in the Tarim Basin, northwestern China, Palaeogeography, Palaeoclimatology,  
666 Palaeoecology, 613, 111408, <https://doi.org/10.1016/j.palaeo.2023.111408>, 2023.
- 667 Robson, B. E., Collinson, M. E., Riegel, W., Wilde, V., Scott, A. C., and Pancost, R. D.: Early  
668 Paleogene wildfires in peat-forming environments at Schöningen, Germany, Palaeogeography,  
669 Palaeoclimatology, Palaeoecology, 437, 53-62, <https://doi.org/10.1016/j.palaeo.2015.07.016>,  
670 2015.
- 671 Roos-Barraclough, F., Martinez-Cortizas, A., García-Rodeja, E., and Shotyk, W.: A 14 500 year  
672 record of the accumulation of atmospheric mercury in peat: volcanic signals, anthropogenic  
673 influences and a correlation to bromine accumulation, Earth and Planetary Science Letters, 202,  
674 435-451, [https://doi.org/10.1016/S0012-821X\(02\)00805-1](https://doi.org/10.1016/S0012-821X(02)00805-1), 2002.
- 675 Schneider, E. L., and Carlquist, S.: SEM studies on vessels in ferns. 17. Psilotaceae, American  
676 Journal of Botany, 87, 176-181, <https://doi.org/10.2307/2656903>, 2000.
- 677 Scotese, C.: The PALEOMAP Project PaleoAtlas for ArcGIS, version 1, Volume, 2, 16-31, 2008.
- 678 Scotese, C. R.: An atlas of Phanerozoic paleogeographic maps: the seas come in and the seas go out,



- 679 Annual Review of Earth and Planetary Sciences, 49, 679-728,  
680 <https://doi.org/10.1146/annurev-earth-081320-064052>, 2021.
- 681 Scott, A. C., and Jones, T. P.: Fossil charcoal: a plant-fossil record preserved by fire, *Geology Today*,  
682 7, 214-216, <https://doi.org/10.1111/j.1365-2451.1991.tb00806.x>, 1991.
- 683 Scott, A. C.: The Pre-Quaternary history of fire, *Palaeogeography, palaeoclimatology,*  
684 *palaeoecology*, 164, 281-329, [https://doi.org/10.1016/s0031-0182\(00\)00192-9](https://doi.org/10.1016/s0031-0182(00)00192-9), 2000.
- 685 Scott, A. C., and Glasspool, I. J.: The diversification of Paleozoic fire systems and fluctuations in  
686 atmospheric oxygen concentration, *Proceedings of the National Academy of Sciences*, 103,  
687 10861-10865, <https://doi.org/10.1073/pnas.0604090103>, 2006.
- 688 Scott, A. C., and Glasspool, I. J.: Observations and experiments on the origin and formation of  
689 inertinite group macerals, *International Journal of Coal Geology*, 70, 53-66,  
690 <https://doi.org/10.1016/j.coal.2006.02.009>, 2007.
- 691 Scott, A. C.: Charcoal recognition, taphonomy and uses in palaeoenvironmental analysis,  
692 *Palaeogeography, Palaeoclimatology, Palaeoecology*, 291, 11-39,  
693 <https://doi.org/10.1016/j.palaeo.2009.12.012>, 2010.
- 694 Scott, A. C.: *Fire: A Very Short Introduction*, Oxford University Press, Great Clarendon Street,  
695 Oxford, OX2 6DP, United Kingdom, <https://doi.org/10.1093/actrade/9780198830030.001.0001>,  
696 2020.
- 697 Scott, A. C.: Charcoalified vegetation from the Pennsylvanian of Yorkshire, England: Implications  
698 for the interpretation of Carboniferous wildfires, *Review of Palaeobotany and Palynology*, 296,  
699 <https://doi.org/10.1016/j.revpalbo.2021.104540>, 104540, 2022.
- 700 Selin, N. E.: Global biogeochemical cycling of mercury: a review, *Annual review of environment*  
701 *and resources*, 34, 43-63, <https://doi.org/10.1146/annurev.environ.051308.084314>, 2009.



- 702 Shen, J., Feng, Q., Algeo, T. J., Liu, J., Zhou, C., Wei, W., Liu, J., Them II, T. R., Gill, B. C., and  
703 Chen, J.: Sedimentary host phases of mercury (Hg) and implications for use of Hg as a  
704 volcanic proxy, *Earth and Planetary Science Letters*, 543, 116333,  
705 <https://doi.org/10.1016/j.epsl.2020.116333>, 2020.
- 706 Shen, W., Zhao, Q., Uhl, D., Wang, J., and Sun, Y.: Wildfire activity and impacts on  
707 palaeoenvironments during the late Paleozoic Ice Age-New data from the North China Basin,  
708 *Palaeogeography, Palaeoclimatology, Palaeoecology*, 629, 111781,  
709 <https://doi.org/10.1016/j.palaeo.2023.111781>, 2023.
- 710 Shi, Y., Pan, B., Wei, M., Li, X., Cai, M., Wang, J., Xu, X., Hu, J., and Shi, W.: Wildfire evolution  
711 and response to climate change in the Yinchuan Basin during the past 1.5 Ma based on the  
712 charcoal records of the PL02 core, *Quaternary Science Reviews*, 241, 106393,  
713 <https://doi.org/10.1016/j.quascirev.2020.106393>, 2020.
- 714 Stockhecke, M., Timmermann, A., Kipfer, R., Haug, G. H., Kwiecien, O., Friedrich, T., Menviel, L.,  
715 Litt, T., Pickarski, N., and Anselmetti, F. S.: Millennial to orbital-scale variations of drought  
716 intensity in the Eastern Mediterranean, *Quaternary Science Reviews*, 133, 77-95,  
717 <https://doi.org/10.1016/j.quascirev.2015.12.016>, 2016.
- 718 Sun, Q., Wang, S., Zhou, J., Chen, Z., Shen, J., Xie, X., Wu, F., and Chen, P.: Sediment  
719 geochemistry of Lake Daihai, north-central China: implications for catchment weathering and  
720 climate change during the Holocene, *Journal of Paleolimnology*, 43, 75-87,  
721 <https://doi.org/10.1007/s10933-009-9315-x>, 2010.
- 722 Sun, R., Sonke, J. E., and Liu, G.: Biogeochemical controls on mercury stable isotope compositions  
723 of world coal deposits: A review, *Earth-science reviews*, 152, 1-13,  
724 <https://doi.org/10.1016/j.earscirev.2015.11.005>, 2016.



- 725 Swain, D. L.: A shorter, sharper rainy season amplifies California wildfire risk, *Geophysical*  
726 *Research Letters*, 48, e2021GL092843, <https://doi.org/10.1029/2021gl092843>, 2021.
- 727 Teichmüller, M.: The genesis of coal from the viewpoint of coal petrology, *International Journal of*  
728 *Coal Geology*, 12, 1-87, [https://doi.org/10.1016/0166-5162\(89\)90047-5](https://doi.org/10.1016/0166-5162(89)90047-5), 1989.
- 729 Thevenon, F., Bard, E., Williamson, D., and Beaufort, L.: A biomass burning record from the West  
730 Equatorial Pacific over the last 360 ky: methodological, climatic and anthropic implications,  
731 *Palaeogeography, Palaeoclimatology, Palaeoecology*, 213, 83-99,  
732 [https://doi.org/10.1016/s0031-0182\(04\)00364-5](https://doi.org/10.1016/s0031-0182(04)00364-5), 2004.
- 733 Turetsky, M. R., Harden, J. W., Friedli, H. R., Flannigan, M., Payne, N., Crock, J., and Radke, L.:  
734 Wildfires threaten mercury stocks in northern soils, *Geophysical research letters*, 33,  
735 <https://doi.org/10.1029/2005gl025595>, 2006.
- 736 Uhl, D., Spiekermann, R., Wuttke, M., Poschmann, M. J., and Jasper, A.: Wildfires during the  
737 Paleogene (late Eocene - late Oligocene) of the Neuwied Basin (W-Germany), *Review of*  
738 *Palaeobotany and Palynology*, 297, 104565, <https://doi.org/10.1016/j.revpalbo.2021.104565>,  
739 2022.
- 740 Varma, A.: Influence of petrographical composition on coking behavior of inertinite-rich coals,  
741 *International journal of coal geology*, 30, 337-347, [https://doi.org/10.1016/0166-5162\(95\)](https://doi.org/10.1016/0166-5162(95)00053-4)  
742 [00053-4](https://doi.org/10.1016/0166-5162(95)00053-4), 1996.
- 743 Verardo, D. J., and Ruddiman, W. F.: Late Pleistocene charcoal in tropical Atlantic deep-sea  
744 sediments: climatic and geochemical significance, *Geology*, 24, 855-857,  
745 [https://doi.org/10.1130/0091-7613\(1996\)024<0855:LPCITA>2.3.co;2](https://doi.org/10.1130/0091-7613(1996)024<0855:LPCITA>2.3.co;2), 1996.
- 746 Wang, C. a., Liu, Y., Zhang, X., and Che, D.: A study on coal properties and combustion  
747 characteristics of blended coals in northwestern China, *Energy & Fuels*, 25, 3634-3645,



- 748 <https://doi.org/10.1021/ef200686d>, 2011.
- 749 Wang, S.: Ordos basin superposed evolution and structural controls of coal forming activities, Earth  
750 Science Frontiers, 24, 54-63, <https://10.13745/j.esf.yx.2016-12-11>, 2017. (in Chinese).
- 751 Wang, X., Yuan, W., Lin, C.-J., Zhang, L., Zhang, H., and Feng, X.: Climate and vegetation as  
752 primary drivers for global mercury storage in surface soil, Environmental Science &  
753 Technology, 53, 10665-10675, <https://doi.org/10.1021/acs.est.9b02386>, 2019.
- 754 Woerndle, G. E., Tsz-Ki Tsui, M., Sebestyen, S. D., Blum, J. D., Nie, X., and Kolka, R. K.: New  
755 insights on ecosystem mercury cycling revealed by stable isotopes of mercury in water flowing  
756 from a headwater peatland catchment, Environmental science & technology, 52, 1854-1861,  
757 <https://doi.org/10.1021/acs.est.7b04449>, 2018.
- 758 Xie, W., Tan, J., Wang, W., Jia, J., Liu, Z., Wu, J., Wang, Y., and Song, X.: Record of Middle  
759 Jurassic wildfire and its incidental mercury emissions in northern Qaidam Basin, China:  
760 Evidence from the inertinite and mercury anomalies in coal, International Journal of Coal  
761 Geology, 261, 104078, <https://doi.org/10.2139/ssrn.4105730>, 2022.
- 762 Xu, Y., Uhl, D., Zhang, N., Zhao, C., Qin, S., Liang, H., and Sun, Y.: Evidence of widespread  
763 wildfires in coal seams from the Middle Jurassic of Northwest China and its impact on  
764 paleoclimate, Palaeogeography, Palaeoclimatology, Palaeoecology, 559, 109819,  
765 <https://doi.org/10.1016/j.palaeo.2020.109819>, 2020.
- 766 Yudovich, Y. E., and Ketris, M.: Mercury in coal: A review: Part 1. Geochemistry, International  
767 Journal of Coal Geology, 62, 107-134, [https://doi.org/10.1016/s0140-6701\(06\)81438-4](https://doi.org/10.1016/s0140-6701(06)81438-4), 2005.
- 768 Yunker, M. B., Macdonald, R. W., Vingarzan, R., Mitchell, R. H., Goyette, D., and Sylvestre, S.:  
769 PAHs in the Fraser River basin: a critical appraisal of PAH ratios as indicators of PAH source  
770 and composition, Organic geochemistry, 33, 489-515, [https://doi.org/10.1016/s0146-6380\(02\)](https://doi.org/10.1016/s0146-6380(02))



- 771 [00002-5](#), 2002.
- 772 Zhang, X., Li, S., Zhao, X., Geng, G., and Yan, M.: The sedimentary environment of Early  
773 Cretaceous rift basin in eastern China and its response to the Faraoni event, *Geosciences*  
774 *Journal*, 24, 359-377, <https://doi.org/10.1007/s12303-019-0031-x>, 2020a.
- 775 Zhang, X., Gao, Z., Fan, T., Xue, J., Li, W., Cao, F., and Zhang, H.: Geochemical characteristics,  
776 provenance and paleodepositional environment of the Lower Jurassic Huxishan Formation in  
777 the Lenghu area, northwestern Qaidam Basin, North West China: Implications for organic  
778 matter origin, *Journal of Petroleum Science and Engineering*, 205, 108951,  
779 <https://doi.org/10.1016/j.petrol.2021.108951>, 2021.
- 780 Zhang, Z.-H., Lü, D.-W., Wang, T.-T., An, D.-Z., Liu, H.-Y., Wang, D.-D., and Wang, C.-S.:  
781 Intensive peatland wildfires during the Aptian-Albian oceanic anoxic event 1b: Evidence from  
782 borehole SK-2 in the Songliao Basin, NE China, *Journal of Palaeogeography*, 11, 448-467,  
783 <https://doi.org/10.1016/j.jop.2022.06.002>, 2022.
- 784 Zhang, Z., Wang, C., Lv, D., Hay, W. W., Wang, T., and Cao, S.: Precession-scale climate forcing of  
785 peatland wildfires during the early middle Jurassic greenhouse period, *Global and planetary*  
786 *change*, 184, 103051, <https://doi.org/10.1016/j.gloplacha.2019.103051>, 2020b.
- 787 Zhang, Z., Lv, D., Hower, J. C., Wang, L., Shen, Y., Zhang, A., Xu, J., and Gao, J.: Geochronology,  
788 mineralogy, and geochemistry of tonsteins from the Pennsylvanian Taiyuan Formation of the  
789 Jungar Coalfield, Ordos Basin, North China, *International Journal of Coal Geology*, 267,  
790 104183, <https://doi.org/10.1016/j.coal.2023.104183>, 2023a.
- 791 Zhang, Z., Lv, D., Lu, M., Yu, Z., Gao, Y., Wang, T., Gao, J., and Wang, C.: Wildfire activity driven  
792 by the 405-kyr orbital climate cycles in the Middle Jurassic, *Global and Planetary Change*, 222,  
793 104069, <https://doi.org/10.1016/j.gloplacha.2023.104069>, 2023b.





- 794 Zhao, C., Zhang, K., Xiao, L., Uhl, D., Shi, Z., Zhao, W., Zhao, Q., Sun, Y., and Liu, B.:  
795 Paleoclimate-induced wildfires in a paleomire in the Ordos Basin, Northern China during the  
796 Middle Jurassic greenhouse period, *Chemical Geology*, 637, 121677,  
797 <https://doi.org/10.1016/j.chemgeo.2023.121677>, 2023.
- 798 Zheng, L., Sun, R., Hintelmann, H., Zhu, J., Wang, R., and Sonke, J. E.: Mercury stable isotope  
799 compositions in magmatic-affected coal deposits: New insights to mercury sources, migration  
800 and enrichment, *Chemical Geology*, 479, 86-101,  
801 <https://doi.org/10.1016/j.chemgeo.2017.12.032>, 2018.
- 802 Zhou, B., Shen, C., Sun, W., Zheng, H., Yang, Y., Sun, Y., and An, Z.: Elemental carbon record of  
803 paleofire history on the Chinese Loess Plateau during the last 420 ka and its response to  
804 environmental and climate changes, *Palaeogeography, Palaeoclimatology, Palaeoecology*, 252,  
805 617-625, <https://doi.org/10.1016/j.palaeo.2007.05.014>, 2007.
- 806 Zhou, X., Hui, Z., Vachula, R. S., Wei, X., Chen, P., Zhang, J., Wang, X., and Peng, T.:  
807 Mid-Miocene palaeofire and its complex relationship with vegetation changes in the Wushan  
808 Basin, northeastern Tibetan Plateau, China: Evidence from a high-resolution charcoal record,  
809 *Paleoceanography and Paleoclimatology*, 38, e2022PA004461,  
810 <https://doi.org/10.1029/2022pa004461>, 2023.
